# Supplementary material for: SAP30 Gene Is a Probable Regulator of Muscle Hypertrophy in Chickens
Source: Front Genet. 2021 Sep 27;12:709937. doi: 10.3389/fgene.2021.709937 (PMC8502938; doi:10.3389/fgene.2021.709937)
Supplement: Supplementary Table 2 — List with 1,190 DE genes. [file Table_2.XLSX]

## Sheet: Upregulated_genes
Ensembl_ID	Gene_name	log2FoldChange	lfcSE	stat	pvalue	padj
ENSMUSG00000052373	Mpp3	2.03357	0.397099	5.12107	3.04e-07	2.22e-05
ENSMUSG00000052374	Actn2	1.93419	0.199124	9.71348	2.64e-22	3.55e-19
ENSMUSG00000065460	Mir133a-2	1.9211	0.42346	4.53667	5.71e-06	0.000272432
ENSMUSG00000005583	Mef2c	1.90171	0.252747	7.52417	5.31e-14	1.83e-11
ENSMUSG00000086266	Igf2os	1.86789	0.464857	4.0182	5.86e-05	0.001886
ENSMUSG00000040752	Myh6	1.85325	0.257279	7.20327	5.88e-13	1.52e-10
ENSMUSG00000054034	Tceal5	1.76524	0.424222	4.16114	3.17e-05	0.00114024
ENSMUSG00000053093	Myh7	1.62111	0.350721	4.62222	3.8e-06	0.00019187
ENSMUSG00000101968	1700027A15Rik	1.58327	0.491743	3.2197	0.00128325	0.0210374
ENSMUSG00000072945	Ripply1	1.57861	0.506402	3.1173	0.00182515	0.0271111
ENSMUSG00000032942	Ucp3	1.55489	0.464716	3.3459	0.000820165	0.0153558
ENSMUSG00000108383	Gm6567	1.55219	0.526475	2.94828	0.00319552	0.04026
ENSMUSG00000090142	Gm15795	1.52966	0.424523	3.60324	0.00031427	0.0073219
ENSMUSG00000027456	Sdcbp2	1.52512	0.380246	4.01088	6.05e-05	0.00193621
ENSMUSG00000006216	Clcnkb	1.51543	0.532043	2.84833	0.00439498	0.0497321
ENSMUSG00000099478	Gm28370	1.49912	0.404714	3.70415	0.000212101	0.00534947
ENSMUSG00000074652	Myh7b	1.49221	0.231582	6.44353	1.17e-10	1.8e-08
ENSMUSG00000029095	Ablim2	1.47806	0.248832	5.93999	2.85e-09	3.33e-07
ENSMUSG00000086918	4930429F24Rik	1.47703	0.322362	4.58189	4.61e-06	0.000226906
ENSMUSG00000051517	Arhgef39	1.47548	0.225583	6.54077	6.12e-11	1.01e-08
ENSMUSG00000023393	Slc17a9	1.47435	0.455562	3.23634	0.00121074	0.0201186
ENSMUSG00000041608	Entpd3	1.44828	0.427577	3.38719	0.00070613	0.0137175
ENSMUSG00000109305	Smim38	1.44515	0.475371	3.04006	0.00236535	0.0327134
ENSMUSG00000061039	Olfr920	1.43019	0.3255	4.39383	1.11e-05	0.000467854
ENSMUSG00000042429	Adora1	1.42294	0.368065	3.86601	0.000110631	0.0031857
ENSMUSG00000110218	Gm20219	1.42154	0.460882	3.0844	0.00203966	0.0295783
ENSMUSG00000104453	Gm37829	1.40096	0.418617	3.34663	0.000818002	0.0153367
ENSMUSG00000032735	Ablim3	1.38788	0.170705	8.13032	4.28e-16	2.06e-13
ENSMUSG00000070424	Art5	1.3735	0.37849	3.62889	0.000284647	0.00673682
ENSMUSG00000032322	Pstpip1	1.35936	0.183453	7.40987	1.26e-13	3.94e-11
ENSMUSG00000091679	Vmn2r96	1.35595	0.449683	3.01535	0.0025668	0.0346314
ENSMUSG00000045103	Dmd	1.3408	0.341826	3.92246	8.76e-05	0.00264777
ENSMUSG00000006362	Cbfa2t3	1.30727	0.176709	7.39788	1.38e-13	4.09e-11
ENSMUSG00000117231	Gm41609	1.30533	0.354881	3.67823	0.000234863	0.00579314
ENSMUSG00000044951	Mylk4	1.29947	0.187125	6.94439	3.8e-12	8.24e-10
ENSMUSG00000087090	Nctc1	1.29175	0.217072	5.95077	2.67e-09	3.18e-07
ENSMUSG00000020447	Npc1l1	1.2856	0.288651	4.45384	8.43e-06	0.000371762
ENSMUSG00000037139	Myom3	1.26263	0.107236	11.7744	5.29e-32	3.56e-28
ENSMUSG00000068232	Vmn1r42	1.25892	0.418694	3.00676	0.00264045	0.0354247
ENSMUSG00000089636	1700058P15Rik	1.25859	0.327538	3.84257	0.000121751	0.00345296
ENSMUSG00000031489	Adrb3	1.24959	0.382433	3.26748	0.00108511	0.0184881
ENSMUSG00000082305	Gm2420	1.24694	0.276991	4.50174	6.74e-06	0.000311362
ENSMUSG00000031842	Pde4c	1.23832	0.328687	3.7675	0.000164894	0.00440689
ENSMUSG00000042750	Bex2	1.2324	0.407401	3.02502	0.0024862	0.0336932
ENSMUSG00000097113	Gm19705	1.23025	0.245799	5.00512	5.58e-07	3.79e-05
ENSMUSG00000038763	Alpk3	1.22108	0.14247	8.57078	1.03e-17	5.76e-15
ENSMUSG00000026610	Esrrg	1.2184	0.352148	3.4599	0.000540384	0.0112801
ENSMUSG00000099906	Gm28653	1.209	0.103342	11.6991	1.29e-31	5.78e-28
ENSMUSG00000085779	Atcayos	1.20423	0.259457	4.64135	3.46e-06	0.000177602
ENSMUSG00000001027	Scn4a	1.20328	0.162682	7.39653	1.4e-13	4.09e-11
ENSMUSG00000100410	2310020H05Rik	1.1965	0.365086	3.27732	0.00104798	0.0181079
ENSMUSG00000110125	Gm33148	1.19237	0.340214	3.50475	0.000457036	0.00997392
ENSMUSG00000067642	Adgrf3	1.19077	0.418249	2.84704	0.00441283	0.0498921
ENSMUSG00000118523	AC158912.1	1.19064	0.34855	3.41597	0.000635563	0.0126764
ENSMUSG00000025735	Rhbdl1	1.18944	0.406578	2.9255	0.00343904	0.0422526
ENSMUSG00000055805	Fmnl1	1.18588	0.221173	5.36177	8.24e-08	6.8e-06
ENSMUSG00000004939	Nmrk2	1.17987	0.252389	4.67479	2.94e-06	0.000156969
ENSMUSG00000056632	Dsg3	1.17119	0.373399	3.13658	0.00170933	0.0259645
ENSMUSG00000051985	Igfn1	1.16249	0.126115	9.21765	3.04e-20	2.92e-17
ENSMUSG00000022847	Thpo	1.1596	0.280109	4.13982	3.48e-05	0.00123937
ENSMUSG00000003134	Tbc1d8	1.15696	0.196008	5.90262	3.58e-09	4.06e-07
ENSMUSG00000030996	Art1	1.155	0.192666	5.99481	2.04e-09	2.5e-07
ENSMUSG00000034768	Asb16	1.15268	0.206044	5.59432	2.21e-08	2.07e-06
ENSMUSG00000052131	Akr1b7	1.15158	0.37045	3.1086	0.00187979	0.0278304
ENSMUSG00000107096	Gm43597	1.14783	0.258337	4.44316	8.86e-06	0.00038691
ENSMUSG00000117864	Gm19500	1.13228	0.229288	4.93826	7.88e-07	5.12e-05
ENSMUSG00000027408	Cpxm1	1.1209	0.376265	2.97902	0.00289172	0.0376316
ENSMUSG00000042828	Trim72	1.11684	0.100949	11.0635	1.89e-28	5.07e-25
ENSMUSG00000109498	Gm45222	1.10819	0.316624	3.50003	0.000465211	0.0101195
ENSMUSG00000084929	Foxo6os	1.10348	0.358343	3.07939	0.00207423	0.0298862
ENSMUSG00000090088	Gm15934	1.10223	0.371857	2.96413	0.0030354	0.0388989
ENSMUSG00000020061	Mybpc1	1.10197	0.131623	8.37218	5.66e-17	2.92e-14
ENSMUSG00000103039	Gm37123	1.10055	0.273233	4.02787	5.63e-05	0.00183205
ENSMUSG00000058925	Ccdc192	1.0971	0.359125	3.05494	0.00225104	0.0317199
ENSMUSG00000018566	Slc2a4	1.09284	0.333836	3.27359	0.00106191	0.0182547
ENSMUSG00000015812	Gnrh1	1.09277	0.360048	3.03508	0.00240475	0.033077
ENSMUSG00000101335	Gm28229	1.088	0.344985	3.15377	0.00161174	0.0248471
ENSMUSG00000038295	Atg9b	1.08675	0.156471	6.94541	3.77e-12	8.24e-10
ENSMUSG00000003279	Dlgap1	1.07763	0.32938	3.2717	0.00106903	0.0182606
ENSMUSG00000091712	Sec14l5	1.07669	0.317868	3.38723	0.000706025	0.0137175
ENSMUSG00000110071	Gm45512	1.07169	0.331934	3.22861	0.00124394	0.0205002
ENSMUSG00000005716	Pvalb	1.07065	0.247667	4.32296	1.54e-05	0.000603028
ENSMUSG00000107355	AI839979	1.06722	0.230777	4.62444	3.76e-06	0.000191259
ENSMUSG00000113425	Gm48653	1.05658	0.33112	3.19093	0.00141813	0.0226413
ENSMUSG00000025172	Ankrd2	1.05038	0.102161	10.2816	8.53e-25	1.55e-21
ENSMUSG00000007877	Tcap	1.03052	0.203864	5.05492	4.31e-07	3.1e-05
ENSMUSG00000117113	Gm49883	1.02972	0.262082	3.92899	8.53e-05	0.00258895
ENSMUSG00000033987	Dnah17	1.02566	0.29984	3.42069	0.000624632	0.0125142
ENSMUSG00000031179	3830417A13Rik	1.02137	0.186821	5.46711	4.57e-08	3.99e-06
ENSMUSG00000006542	Prkag3	1.01479	0.128581	7.89224	2.97e-15	1.25e-12
ENSMUSG00000092397	C130080G10Rik	1.0111	0.245974	4.11061	3.95e-05	0.0013779
ENSMUSG00000026458	Ppfia4	1.01023	0.160172	6.30714	2.84e-10	4.02e-08
ENSMUSG00000021373	Cap2	1.00812	0.200714	5.02268	5.1e-07	3.58e-05
ENSMUSG00000025175	Fn3k	1.00041	0.149221	6.70421	2.02e-11	3.68e-09
ENSMUSG00000042895	Abra	0.997324	0.205836	4.84523	1.26e-06	7.62e-05
ENSMUSG00000074486	Bglap2	0.987357	0.283147	3.48709	0.00048831	0.0105198
ENSMUSG00000016356	Col20a1	0.98154	0.269914	3.6365	0.000276372	0.00661551
ENSMUSG00000045094	Arhgef37	0.979482	0.169237	5.78763	7.14e-09	7.38e-07
ENSMUSG00000030470	Csrp3	0.978534	0.140417	6.96877	3.2e-12	7.28e-10
ENSMUSG00000043795	Prr33	0.975455	0.166824	5.8472	5e-09	5.42e-07
ENSMUSG00000068614	Actc1	0.974754	0.105095	9.27493	1.78e-20	2.17e-17
ENSMUSG00000029381	Shroom3	0.953336	0.175932	5.41876	6e-08	5.07e-06
ENSMUSG00000020908	Myh3	0.95235	0.103447	9.20613	3.38e-20	3.03e-17
ENSMUSG00000090248	Gm14027	0.951332	0.300651	3.16424	0.00155488	0.0242768
ENSMUSG00000089706	B230216N24Rik	0.946923	0.297662	3.1812	0.00146664	0.0232501
ENSMUSG00000030699	Tbx6	0.945344	0.277407	3.40779	0.000654909	0.0128901
ENSMUSG00000090761	Gm17201	0.936543	0.253978	3.6875	0.00022647	0.00563784
ENSMUSG00000007097	Atp1a2	0.932746	0.10078	9.25524	2.14e-20	2.21e-17
ENSMUSG00000039824	Myl6b	0.928087	0.107564	8.6282	6.23e-18	3.81e-15
ENSMUSG00000041476	Smpx	0.928017	0.176041	5.2716	1.35e-07	1.07e-05
ENSMUSG00000030592	Ryr1	0.923199	0.15075	6.12405	9.12e-10	1.19e-07
ENSMUSG00000002076	Hsf2bp	0.920246	0.247918	3.7119	0.000205709	0.0052275
ENSMUSG00000112096	A430103D13Rik	0.917294	0.27781	3.30187	0.000960409	0.0169433
ENSMUSG00000006014	Prg4	0.914715	0.157407	5.81115	6.2e-09	6.57e-07
ENSMUSG00000055775	Myh8	0.906353	0.122964	7.3709	1.69e-13	4.65e-11
ENSMUSG00000006576	Slc4a3	0.904028	0.10306	8.77186	1.76e-18	1.18e-15
ENSMUSG00000089708	5330439A09Rik	0.898584	0.299375	3.00154	0.00268619	0.0356823
ENSMUSG00000018166	Erbb3	0.889837	0.13344	6.66842	2.59e-11	4.63e-09
ENSMUSG00000028116	Myoz2	0.886179	0.130245	6.80394	1.02e-11	1.9e-09
ENSMUSG00000032503	Arpp21	0.883435	0.150365	5.87526	4.22e-09	4.69e-07
ENSMUSG00000115138	Gm36899	0.879666	0.28516	3.08481	0.0020368	0.0295688
ENSMUSG00000063767	S100a7a	0.879404	0.295485	2.97614	0.00291901	0.0378767
ENSMUSG00000061462	Obscn	0.876909	0.276977	3.166	0.00154548	0.0241581
ENSMUSG00000113854	Gm2099	0.876835	0.275938	3.17765	0.00148474	0.0234539
ENSMUSG00000027245	Hypk	0.873064	0.216426	4.034	5.48e-05	0.00179353
ENSMUSG00000047230	Cldn2	0.872242	0.19112	4.56384	5.02e-06	0.000242875
ENSMUSG00000061689	Dlgap4	0.869253	0.264793	3.28277	0.00102793	0.0178533
ENSMUSG00000091509	Gm17066	0.86885	0.296351	2.93183	0.00336976	0.0416741
ENSMUSG00000051832	E230016K23Rik	0.867018	0.190835	4.54328	5.54e-06	0.000264968
ENSMUSG00000064147	Rab44	0.863775	0.290208	2.9764	0.00291651	0.0378767
ENSMUSG00000044938	Klhl31	0.861581	0.14686	5.86666	4.45e-09	4.9e-07
ENSMUSG00000068206	Pick1	0.858304	0.208391	4.11872	3.81e-05	0.00133725
ENSMUSG00000006958	Chrd	0.853498	0.151283	5.64174	1.68e-08	1.64e-06
ENSMUSG00000067653	Ankrd23	0.851952	0.267342	3.18675	0.00143882	0.022863
ENSMUSG00000060716	Plekhh1	0.850604	0.127926	6.64921	2.95e-11	5.14e-09
ENSMUSG00000027249	F2	0.846029	0.255839	3.30688	0.000943406	0.0168871
ENSMUSG00000037185	Krt80	0.841861	0.122969	6.84611	7.59e-12	1.5e-09
ENSMUSG00000097743	Gm16973	0.837211	0.290036	2.88658	0.00389457	0.0455117
ENSMUSG00000032648	Pygm	0.834771	0.133452	6.25523	3.97e-10	5.5e-08
ENSMUSG00000115852	AC169509.1	0.834262	0.263451	3.16667	0.00154194	0.0241307
ENSMUSG00000051043	Gprc5c	0.8331	0.177011	4.70648	2.52e-06	0.000137724
ENSMUSG00000057897	Camk2b	0.832296	0.167975	4.95489	7.24e-07	4.75e-05
ENSMUSG00000020182	Ddc	0.822695	0.268441	3.06472	0.00217877	0.0308957
ENSMUSG00000062694	Cav3	0.822467	0.144453	5.69366	1.24e-08	1.24e-06
ENSMUSG00000106022	Gm42929	0.821657	0.281226	2.92169	0.00348133	0.0425064
ENSMUSG00000026253	Chrng	0.815911	0.0881582	9.25507	2.14e-20	2.21e-17
ENSMUSG00000006221	Hspb7	0.814188	0.109918	7.40722	1.29e-13	3.94e-11
ENSMUSG00000104186	Gm37819	0.813738	0.238334	3.41428	0.000639502	0.0127293
ENSMUSG00000028927	Padi2	0.812656	0.164052	4.95365	7.28e-07	4.75e-05
ENSMUSG00000110185	Igip	0.809364	0.18693	4.32976	1.49e-05	0.000591933
ENSMUSG00000097042	Gm17491	0.802412	0.213443	3.75938	0.000170338	0.00448113
ENSMUSG00000031508	Ankrd10	0.799546	0.111546	7.16789	7.62e-13	1.93e-10
ENSMUSG00000026785	Pkn3	0.799405	0.237376	3.36768	0.000758045	0.0143746
ENSMUSG00000025488	Cox8b	0.796266	0.228712	3.48153	0.000498556	0.0106238
ENSMUSG00000033032	Afap1l1	0.79619	0.22999	3.46184	0.00053649	0.0112162
ENSMUSG00000022330	Osr2	0.795991	0.21443	3.71213	0.00020552	0.0052275
ENSMUSG00000057003	Myh4	0.795675	0.19584	4.06289	4.85e-05	0.00162485
ENSMUSG00000067931	Zfp948	0.795402	0.150943	5.26954	1.37e-07	1.08e-05
ENSMUSG00000009487	Otog	0.792858	0.157873	5.02211	5.11e-07	3.58e-05
ENSMUSG00000038403	Hjv	0.791794	0.100368	7.88889	3.05e-15	1.25e-12
ENSMUSG00000024471	Myot	0.78499	0.236561	3.31834	0.000905547	0.0165398
ENSMUSG00000026414	Tnnt2	0.782394	0.104446	7.49087	6.84e-14	2.3e-11
ENSMUSG00000029591	Ung	0.781359	0.258973	3.01714	0.0025517	0.034479
ENSMUSG00000052512	Nav2	0.780757	0.145905	5.35113	8.74e-08	7.16e-06
ENSMUSG00000030867	Plk1	0.779765	0.265963	2.93185	0.00336947	0.0416741
ENSMUSG00000048967	Yjefn3	0.776599	0.270902	2.86671	0.00414763	0.0476145
ENSMUSG00000038132	Rbm24	0.774329	0.120428	6.42978	1.28e-10	1.93e-08
ENSMUSG00000021768	Dusp13	0.771648	0.137337	5.61864	1.92e-08	1.84e-06
ENSMUSG00000115326	Gm35019	0.771338	0.140259	5.49939	3.81e-08	3.41e-06
ENSMUSG00000026950	Neb	0.765232	0.0980754	7.80249	6.07e-15	2.33e-12
ENSMUSG00000112854	Gm38403	0.764847	0.170344	4.49	7.12e-06	0.000323461
ENSMUSG00000030730	Atp2a1	0.76391	0.0875947	8.72096	2.76e-18	1.77e-15
ENSMUSG00000042918	Mamstr	0.763824	0.189991	4.02032	5.81e-05	0.0018773
ENSMUSG00000031312	Itgb1bp2	0.754649	0.116499	6.4777	9.31e-11	1.49e-08
ENSMUSG00000027510	Rbm38	0.752297	0.118686	6.33856	2.32e-10	3.35e-08
ENSMUSG00000026489	Coq8a	0.751939	0.11679	6.43837	1.21e-10	1.84e-08
ENSMUSG00000032754	Slc8b1	0.749553	0.130019	5.76493	8.17e-09	8.32e-07
ENSMUSG00000029177	Cenpa	0.746181	0.171429	4.35272	1.34e-05	0.000537963
ENSMUSG00000113178	Mylf-ps	0.74205	0.150651	4.92564	8.41e-07	5.35e-05
ENSMUSG00000043760	Pkhd1	0.737561	0.0999571	7.37877	1.6e-13	4.57e-11
ENSMUSG00000038271	Iffo1	0.736568	0.135111	5.45159	4.99e-08	4.33e-06
ENSMUSG00000110597	Gm8798	0.735323	0.198674	3.70115	0.000214626	0.00539292
ENSMUSG00000032010	Usp2	0.731001	0.11998	6.09267	1.11e-09	1.44e-07
ENSMUSG00000107879	9330102E08Rik	0.729333	0.172262	4.23386	2.3e-05	0.000857776
ENSMUSG00000034898	Filip1	0.726906	0.140177	5.18564	2.15e-07	1.64e-05
ENSMUSG00000031543	Ank1	0.725408	0.124583	5.8227	5.79e-09	6.18e-07
ENSMUSG00000043415	Otud1	0.720589	0.0972513	7.40956	1.27e-13	3.94e-11
ENSMUSG00000020475	Pgam2	0.71759	0.181446	3.95485	7.66e-05	0.00236665
ENSMUSG00000046056	Sbsn	0.711668	0.244089	2.91561	0.00354997	0.0429157
ENSMUSG00000002980	Bcam	0.706497	0.241509	2.92535	0.00344073	0.0422526
ENSMUSG00000090066	1110002E22Rik	0.706145	0.111107	6.35553	2.08e-10	3.03e-08
ENSMUSG00000042451	Mybph	0.705174	0.091586	7.69958	1.37e-14	5.1e-12
ENSMUSG00000020333	Acsl6	0.705133	0.141099	4.99743	5.81e-07	3.92e-05
ENSMUSG00000023959	Clic5	0.704752	0.14591	4.83004	1.37e-06	8.13e-05
ENSMUSG00000061816	Myl1	0.704212	0.126454	5.5689	2.56e-08	2.38e-06
ENSMUSG00000031461	Myom2	0.702308	0.0895835	7.8397	4.52e-15	1.79e-12
ENSMUSG00000048458	Inka2	0.701512	0.220362	3.18345	0.00145529	0.0230973
ENSMUSG00000038239	Hrc	0.700854	0.0994934	7.04423	1.86e-12	4.64e-10
ENSMUSG00000029683	Lmod2	0.696404	0.129388	5.38231	7.35e-08	6.1e-06
ENSMUSG00000032523	Hhatl	0.695922	0.141358	4.92312	8.52e-07	5.38e-05
ENSMUSG00000040998	Npnt	0.695403	0.101848	6.82784	8.62e-12	1.63e-09
ENSMUSG00000031022	BC051019	0.695241	0.13985	4.97133	6.65e-07	4.45e-05
ENSMUSG00000054252	Fgfr3	0.695071	0.144583	4.8074	1.53e-06	8.82e-05
ENSMUSG00000090086	AI480526	0.694413	0.208151	3.3361	0.000849612	0.0157536
ENSMUSG00000097392	Thoc2l	0.688405	0.189607	3.6307	0.000282651	0.00670137
ENSMUSG00000095123	Gm21781	0.688022	0.164015	4.19488	2.73e-05	0.000994618
ENSMUSG00000023755	Rhebl1	0.687092	0.17796	3.86094	0.000112951	0.0032428
ENSMUSG00000028834	Trim63	0.685715	0.133113	5.15136	2.59e-07	1.92e-05
ENSMUSG00000023034	Nr4a1	0.685679	0.171522	3.99761	6.4e-05	0.00202392
ENSMUSG00000075590	Nrbp2	0.680807	0.152849	4.45412	8.42e-06	0.000371762
ENSMUSG00000050556	Kcnb1	0.677728	0.147944	4.58097	4.63e-06	0.000227073
ENSMUSG00000079588	Tmem182	0.675146	0.110912	6.08721	1.15e-09	1.47e-07
ENSMUSG00000080850	Gm12439	0.674068	0.189792	3.55162	0.000382874	0.00875337
ENSMUSG00000040666	Sh3bgr	0.672945	0.178192	3.77652	0.000159037	0.00426733
ENSMUSG00000018845	Unc45b	0.671999	0.113849	5.90256	3.58e-09	4.06e-07
ENSMUSG00000071540	3425401B19Rik	0.667133	0.171176	3.89735	9.73e-05	0.00287328
ENSMUSG00000079110	Capn3	0.666504	0.142122	4.68968	2.74e-06	0.00014714
ENSMUSG00000086753	Gm15751	0.66426	0.225867	2.94093	0.00327225	0.0407681
ENSMUSG00000033788	Dysf	0.663988	0.144338	4.60023	4.22e-06	0.00021012
ENSMUSG00000024617	Camk2a	0.663745	0.114654	5.7891	7.08e-09	7.37e-07
ENSMUSG00000028464	Tpm2	0.658808	0.088427	7.4503	9.31e-14	3.05e-11
ENSMUSG00000068227	Il2rb	0.657728	0.180938	3.63511	0.000277866	0.00662502
ENSMUSG00000086932	Gm22000	0.654601	0.220183	2.97298	0.00294919	0.0380845
ENSMUSG00000020493	Prr11	0.652753	0.19697	3.31397	0.000919823	0.0166872
ENSMUSG00000106825	2510016D11Rik	0.65155	0.200744	3.24567	0.00117176	0.0196408
ENSMUSG00000061859	Patj	0.649592	0.195539	3.32206	0.00089355	0.0163874
ENSMUSG00000026407	Cacna1s	0.647164	0.101426	6.38066	1.76e-10	2.6e-08
ENSMUSG00000086859	Snhg20	0.645775	0.184708	3.4962	0.00047194	0.0102327
ENSMUSG00000022540	Rogdi	0.645075	0.143614	4.49171	7.07e-06	0.000322839
ENSMUSG00000022610	Mapk12	0.644326	0.127267	5.06279	4.13e-07	2.99e-05
ENSMUSG00000050064	Zfp697	0.644004	0.157254	4.09531	4.22e-05	0.00145323
ENSMUSG00000037725	Ckap2	0.64261	0.184493	3.48311	0.000495624	0.0106094
ENSMUSG00000037940	Inpp4b	0.6383	0.153383	4.16149	3.16e-05	0.00114024
ENSMUSG00000018983	E2f2	0.637779	0.121243	5.26032	1.44e-07	1.12e-05
ENSMUSG00000036036	Zfp57	0.634104	0.18671	3.39619	0.0006833	0.0134096
ENSMUSG00000062077	Trim54	0.627727	0.130741	4.80131	1.58e-06	9.06e-05
ENSMUSG00000072720	Myo18b	0.627303	0.112918	5.55541	2.77e-08	2.53e-06
ENSMUSG00000038777	Sema6c	0.626388	0.158181	3.95994	7.5e-05	0.00233381
ENSMUSG00000049871	Nlrc3	0.626125	0.146139	4.28445	1.83e-05	0.000703612
ENSMUSG00000089810	Gm16536	0.625815	0.201695	3.10278	0.00191714	0.0282279
ENSMUSG00000021798	Ldb3	0.623596	0.10122	6.16082	7.24e-10	9.63e-08
ENSMUSG00000030785	Cox6a2	0.62289	0.103918	5.99407	2.05e-09	2.5e-07
ENSMUSG00000100975	Gm28875	0.622552	0.209512	2.97144	0.00296406	0.0382398
ENSMUSG00000054752	Fsd1l	0.621691	0.156281	3.97802	6.95e-05	0.00218762
ENSMUSG00000097296	Gm26532	0.621639	0.165514	3.75581	0.000172785	0.00453662
ENSMUSG00000033196	Myh2	0.621249	0.120682	5.14781	2.64e-07	1.94e-05
ENSMUSG00000030409	Dmpk	0.62082	0.131833	4.70912	2.49e-06	0.000136508
ENSMUSG00000039891	Txlnb	0.618774	0.134991	4.58382	4.57e-06	0.000225643
ENSMUSG00000034212	Ankmy1	0.618503	0.185096	3.34153	0.000833173	0.0154915
ENSMUSG00000026251	Chrnd	0.618018	0.0993036	6.22352	4.86e-10	6.53e-08
ENSMUSG00000009214	Mymk	0.617933	0.0893344	6.91707	4.61e-12	9.54e-10
ENSMUSG00000002007	Srpk3	0.616618	0.13022	4.73521	2.19e-06	0.000121058
ENSMUSG00000102813	Gm37795	0.615976	0.184146	3.34504	0.0008227	0.0153605
ENSMUSG00000061723	Tnnt3	0.613827	0.0922186	6.65622	2.81e-11	4.97e-09
ENSMUSG00000085334	Gm12940	0.6137	0.164611	3.72819	0.000192864	0.00497632
ENSMUSG00000020882	Cacnb1	0.613155	0.110806	5.53361	3.14e-08	2.85e-06
ENSMUSG00000100546	Gm29483	0.611817	0.185104	3.30526	0.00094888	0.0168903
ENSMUSG00000079243	Xirp1	0.611782	0.102968	5.94151	2.82e-09	3.33e-07
ENSMUSG00000026840	Lamc3	0.611626	0.150571	4.06204	4.86e-05	0.00162676
ENSMUSG00000097061	9330151L19Rik	0.610677	0.209339	2.91717	0.00353218	0.042842
ENSMUSG00000058761	Rnf169	0.607352	0.136473	4.45036	8.57e-06	0.000376608
ENSMUSG00000109962	1700025L06Rik	0.607257	0.198258	3.06296	0.00219157	0.0309793
ENSMUSG00000023067	Cdkn1a	0.602394	0.089221	6.7517	1.46e-11	2.69e-09
ENSMUSG00000051373	Plpp7	0.598705	0.14542	4.11707	3.84e-05	0.0013433
ENSMUSG00000024049	Myom1	0.594829	0.106074	5.60768	2.05e-08	1.94e-06
ENSMUSG00000049134	Nrap	0.594139	0.133259	4.45854	8.25e-06	0.000366107
ENSMUSG00000044086	Lmod3	0.593627	0.126559	4.6905	2.73e-06	0.000147135
ENSMUSG00000004187	Kifc2	0.593091	0.173741	3.41364	0.000641001	0.0127293
ENSMUSG00000035504	Reep6	0.591089	0.126687	4.66573	3.08e-06	0.000162755
ENSMUSG00000000794	Kcnn3	0.590551	0.104953	5.62682	1.84e-08	1.78e-06
ENSMUSG00000086413	Gm12415	0.590428	0.165414	3.56939	0.000357807	0.00822223
ENSMUSG00000020067	Mypn	0.588476	0.203816	2.88728	0.00388585	0.0454634
ENSMUSG00000020863	Luc7l3	0.584957	0.119112	4.91099	9.06e-07	5.64e-05
ENSMUSG00000018334	Ksr1	0.584362	0.145731	4.00988	6.07e-05	0.0019398
ENSMUSG00000031636	Pdlim3	0.583319	0.105486	5.52985	3.21e-08	2.89e-06
ENSMUSG00000091898	Tnnc1	0.579593	0.0897418	6.45845	1.06e-10	1.65e-08
ENSMUSG00000026418	Tnni1	0.578309	0.126882	4.55784	5.17e-06	0.00024813
ENSMUSG00000007122	Casq1	0.577251	0.121656	4.74494	2.09e-06	0.000115861
ENSMUSG00000028977	Casz1	0.574318	0.164813	3.48466	0.000492764	0.0105791
ENSMUSG00000100009	Gm7967	0.57341	0.186168	3.08007	0.00206953	0.0298505
ENSMUSG00000002020	Ltbp2	0.572979	0.12673	4.52127	6.15e-06	0.000285927
ENSMUSG00000069372	Ctxn3	0.572566	0.138885	4.12257	3.75e-05	0.00131848
ENSMUSG00000019997	Ccn2	0.569164	0.118232	4.81397	1.48e-06	8.65e-05
ENSMUSG00000031972	Acta1	0.566411	0.0852565	6.64361	3.06e-11	5.14e-09
ENSMUSG00000018599	Mief2	0.566357	0.129007	4.39014	1.13e-05	0.000474389
ENSMUSG00000027663	Zmat3	0.564319	0.141896	3.97699	6.98e-05	0.00218762
ENSMUSG00000055027	Smyd1	0.564105	0.116831	4.82839	1.38e-06	8.15e-05
ENSMUSG00000026564	Dusp27	0.56283	0.102365	5.49824	3.84e-08	3.41e-06
ENSMUSG00000026479	Lamc2	0.557572	0.149873	3.7203	0.000198985	0.00511014
ENSMUSG00000022797	Tfrc	0.557054	0.15025	3.70751	0.000209306	0.00528891
ENSMUSG00000028104	Polr3gl	0.552093	0.136712	4.03837	5.38e-05	0.00176475
ENSMUSG00000022095	Fam160b2	0.550739	0.150628	3.65629	0.000255887	0.00620919
ENSMUSG00000008461	Fut1	0.548509	0.156393	3.50726	0.000452752	0.0098965
ENSMUSG00000023912	Slc25a27	0.548483	0.156544	3.50369	0.00045886	0.00999751
ENSMUSG00000044037	Als2cl	0.54494	0.142062	3.83594	0.000125086	0.00351785
ENSMUSG00000045659	Plekha7	0.543437	0.13541	4.01328	5.99e-05	0.00192119
ENSMUSG00000020069	Hnrnph3	0.54274	0.159036	3.41269	0.000643242	0.0127538
ENSMUSG00000022105	Rb1	0.542591	0.123935	4.37802	1.2e-05	0.000487874
ENSMUSG00000104348	Gm37691	0.542212	0.162451	3.33769	0.000844768	0.0156854
ENSMUSG00000039782	Cpeb2	0.54182	0.158414	3.42028	0.000625569	0.0125142
ENSMUSG00000018893	Mb	0.539779	0.144362	3.73906	0.000184711	0.00480285
ENSMUSG00000017817	Jph2	0.538212	0.108292	4.97002	6.69e-07	4.46e-05
ENSMUSG00000061086	Myl4	0.533888	0.0921064	5.79642	6.77e-09	7.11e-07
ENSMUSG00000037752	Xkr8	0.533824	0.141269	3.77877	0.000157606	0.00425441
ENSMUSG00000042826	Fgf11	0.533512	0.135908	3.92555	8.65e-05	0.00261992
ENSMUSG00000039179	Tekt5	0.531476	0.134216	3.95984	7.5e-05	0.00233381
ENSMUSG00000028211	Trp53inp1	0.530863	0.136771	3.88139	0.000103863	0.00303528
ENSMUSG00000026211	Obsl1	0.527355	0.12092	4.36119	1.29e-05	0.000522204
ENSMUSG00000027257	Pacsin3	0.527046	0.117655	4.47959	7.48e-06	0.000337531
ENSMUSG00000046179	E2f8	0.525666	0.124489	4.22259	2.42e-05	0.000897262
ENSMUSG00000021200	Asb2	0.525384	0.137672	3.8162	0.00013552	0.00377967
ENSMUSG00000024937	Ehbp1l1	0.52509	0.115982	4.52735	5.97e-06	0.000279769
ENSMUSG00000026308	Klhl30	0.524663	0.099497	5.27316	1.34e-07	1.07e-05
ENSMUSG00000039376	Synpo2l	0.52458	0.114581	4.57825	4.69e-06	0.000228996
ENSMUSG00000031642	Sh3rf1	0.52153	0.122828	4.24603	2.18e-05	0.000819359
ENSMUSG00000049804	Armcx4	0.520746	0.145763	3.57255	0.000353516	0.00813753
ENSMUSG00000000631	Myo18a	0.520221	0.126043	4.12733	3.67e-05	0.00129829
ENSMUSG00000025762	Larp1b	0.52018	0.142636	3.6469	0.000265419	0.00639431
ENSMUSG00000020722	Cacng1	0.517481	0.0996597	5.19248	2.08e-07	1.58e-05
ENSMUSG00000050359	Sprr1a	0.516433	0.180771	2.85684	0.00427881	0.0487872
ENSMUSG00000015647	Lama5	0.515165	0.125504	4.10477	4.05e-05	0.0014022
ENSMUSG00000044716	Dok7	0.514753	0.121472	4.23764	2.26e-05	0.000845843
ENSMUSG00000032741	Tpcn1	0.514288	0.102687	5.0083	5.49e-07	3.75e-05
ENSMUSG00000044033	Ccdc141	0.511224	0.0939204	5.44317	5.23e-08	4.51e-06
ENSMUSG00000030399	Ckm	0.510336	0.154184	3.30992	0.000933221	0.0167942
ENSMUSG00000020216	Jsrp1	0.508148	0.0981143	5.17914	2.23e-07	1.68e-05
ENSMUSG00000028158	Mttp	0.50375	0.124249	4.05435	5.03e-05	0.00166464
ENSMUSG00000041219	Arhgap11a	0.502817	0.175315	2.86807	0.0041298	0.0474909
ENSMUSG00000037266	Rsrp1	0.502352	0.142322	3.52968	0.000416064	0.00923912
ENSMUSG00000030353	Tead4	0.501719	0.110759	4.52982	5.9e-06	0.000277517
ENSMUSG00000078956	Gm14221	0.501096	0.166831	3.00362	0.00266788	0.0356503
ENSMUSG00000027522	Stx16	0.500716	0.132353	3.78318	0.000154835	0.00419646
ENSMUSG00000051341	Zfp52	0.499545	0.143502	3.4811	0.00049935	0.0106238
ENSMUSG00000028328	Tmod1	0.499463	0.132452	3.77089	0.000162666	0.00435602
ENSMUSG00000032633	Flcn	0.49937	0.12176	4.10126	4.11e-05	0.00141998
ENSMUSG00000008307	1700109H08Rik	0.499176	0.164075	3.04236	0.00234735	0.0326323
ENSMUSG00000047443	Erfe	0.496171	0.134592	3.68648	0.000227381	0.00565006
ENSMUSG00000029490	Mfsd7a	0.495913	0.150074	3.30446	0.000951602	0.0168903
ENSMUSG00000005148	Klf5	0.494804	0.107602	4.59847	4.26e-06	0.000211123
ENSMUSG00000007682	Dio2	0.494482	0.105929	4.66807	3.04e-06	0.000161554
ENSMUSG00000034724	Cnot6l	0.494474	0.113494	4.35684	1.32e-05	0.000529515
ENSMUSG00000006435	Neurl1a	0.494397	0.106279	4.6519	3.29e-06	0.000170704
ENSMUSG00000001334	Fndc5	0.493716	0.114284	4.3201	1.56e-05	0.000604206
ENSMUSG00000004896	Rrnad1	0.493537	0.151433	3.25911	0.00111763	0.0188747
ENSMUSG00000047789	Slc38a9	0.493017	0.134326	3.67029	0.000242272	0.00594317
ENSMUSG00000046312	Myorg	0.491517	0.101854	4.8257	1.4e-06	8.23e-05
ENSMUSG00000021597	Slf1	0.491078	0.157312	3.12168	0.00179822	0.0268098
ENSMUSG00000051747	Ttn	0.490856	0.102078	4.80865	1.52e-06	8.8e-05
ENSMUSG00000042138	Msantd2	0.489517	0.171064	2.8616	0.00421515	0.0482407
ENSMUSG00000037217	Syn1	0.488103	0.138278	3.52986	0.000415783	0.00923912
ENSMUSG00000046318	Ccbe1	0.486839	0.131646	3.69809	0.000217228	0.00544812
ENSMUSG00000029684	Wasl	0.486095	0.123031	3.951	7.78e-05	0.00239953
ENSMUSG00000030433	Sbk2	0.485912	0.137202	3.54159	0.000397726	0.00900106
ENSMUSG00000070808	Bicra	0.485665	0.157129	3.09086	0.00199576	0.0290357
ENSMUSG00000039086	Ss18l1	0.484725	0.164078	2.95424	0.00313436	0.0396753
ENSMUSG00000040287	Stac3	0.484118	0.123832	3.90947	9.25e-05	0.00275717
ENSMUSG00000024014	Pim1	0.483428	0.118736	4.07145	4.67e-05	0.00157811
ENSMUSG00000025921	Rdh10	0.48324	0.117591	4.1095	3.97e-05	0.00138092
ENSMUSG00000038807	Rap1gap2	0.481762	0.0941049	5.11941	3.06e-07	2.23e-05
ENSMUSG00000028420	Tmem38b	0.481648	0.109513	4.39811	1.09e-05	0.000464542
ENSMUSG00000021250	Fos	0.481227	0.159972	3.00819	0.0026281	0.0353089
ENSMUSG00000082286	Pisd-ps1	0.4809	0.163448	2.94222	0.00325863	0.0406739
ENSMUSG00000032507	Fbxl2	0.480461	0.11819	4.06517	4.8e-05	0.00161308
ENSMUSG00000070461	9230112E08Rik	0.48017	0.1421	3.37909	0.000727266	0.0140187
ENSMUSG00000025348	Itga7	0.479626	0.0975702	4.9157	8.85e-07	5.53e-05
ENSMUSG00000042632	Pla2g6	0.479278	0.122286	3.91933	8.88e-05	0.00267041
ENSMUSG00000025006	Sorbs1	0.477083	0.106504	4.47949	7.48e-06	0.000337531
ENSMUSG00000074415	Mir100hg	0.47589	0.130364	3.65048	0.000261754	0.0063287
ENSMUSG00000039103	Nexn	0.475743	0.099839	4.7651	1.89e-06	0.000106617
ENSMUSG00000042099	Kank3	0.475661	0.148007	3.21378	0.00131	0.02132
ENSMUSG00000112907	Gm47015	0.474041	0.111313	4.25862	2.06e-05	0.000781096
ENSMUSG00000071054	Safb	0.473904	0.155548	3.04666	0.00231397	0.0322683
ENSMUSG00000036777	Anln	0.473165	0.123268	3.83849	0.000123792	0.00349072
ENSMUSG00000042225	Ammecr1	0.469654	0.106876	4.39436	1.11e-05	0.000467854
ENSMUSG00000032712	Resf1	0.464254	0.10746	4.32025	1.56e-05	0.000604206
ENSMUSG00000026854	Usp20	0.464141	0.111003	4.18133	2.9e-05	0.00105294
ENSMUSG00000027331	Knstrn	0.463831	0.157596	2.94316	0.00324884	0.0405893
ENSMUSG00000099465	Gm3830	0.463239	0.160301	2.88981	0.00385478	0.0451786
ENSMUSG00000030846	Tial1	0.461727	0.146108	3.16017	0.00157678	0.0244202
ENSMUSG00000027397	Slc20a1	0.460503	0.11852	3.88546	0.000102136	0.00300442
ENSMUSG00000001419	Mef2d	0.459889	0.112629	4.08323	4.44e-05	0.0015154
ENSMUSG00000026213	Stk11ip	0.459887	0.110749	4.15251	3.29e-05	0.00117885
ENSMUSG00000087528	9830144P21Rik	0.457696	0.148181	3.08877	0.00200986	0.0292092
ENSMUSG00000020740	Gga3	0.457608	0.146483	3.12398	0.00178425	0.02674
ENSMUSG00000111080	Gm20300	0.456797	0.152184	3.0016	0.00268566	0.0356823
ENSMUSG00000002346	Slc25a42	0.454804	0.156827	2.90004	0.00373111	0.0442659
ENSMUSG00000021815	Mss51	0.454329	0.146817	3.09453	0.00197125	0.0287726
ENSMUSG00000031295	Phka2	0.45419	0.136406	3.32969	0.000869419	0.0160324
ENSMUSG00000036833	Pnpla7	0.453663	0.144587	3.13765	0.00170309	0.0259283
ENSMUSG00000055320	Tead1	0.451719	0.121444	3.71956	0.00019957	0.00511014
ENSMUSG00000029068	Ccnl2	0.451548	0.131455	3.43501	0.000592522	0.0121596
ENSMUSG00000036057	Ptpn23	0.449752	0.143624	3.13145	0.00173947	0.0262444
ENSMUSG00000062729	Ppox	0.449437	0.149682	3.00261	0.00267672	0.0356769
ENSMUSG00000029406	Pitpnm2	0.449295	0.127107	3.53477	0.000408134	0.00914401
ENSMUSG00000029467	Atp2a2	0.448242	0.0893781	5.01512	5.3e-07	3.69e-05
ENSMUSG00000027861	Casq2	0.447106	0.103151	4.33447	1.46e-05	0.000581119
ENSMUSG00000073557	Ppp1r12b	0.44652	0.125217	3.56597	0.000362512	0.00831612
ENSMUSG00000041189	Chrnb1	0.446469	0.103295	4.32228	1.54e-05	0.000603028
ENSMUSG00000004891	Nes	0.445566	0.121481	3.66779	0.000244651	0.00597972
ENSMUSG00000027381	Bcl2l11	0.445534	0.109938	4.0526	5.07e-05	0.00167236
ENSMUSG00000022519	Srl	0.444414	0.117993	3.76644	0.000165594	0.00440808
ENSMUSG00000055436	Srsf11	0.443077	0.123339	3.59236	0.000327696	0.00758212
ENSMUSG00000020894	Vamp2	0.442404	0.137536	3.21663	0.00129704	0.0211861
ENSMUSG00000025159	Mms19	0.442351	0.130195	3.39761	0.000679784	0.0133601
ENSMUSG00000058793	Cds2	0.441424	0.0974431	4.53007	5.9e-06	0.000277517
ENSMUSG00000074063	Osgin1	0.439478	0.124071	3.54213	0.000396907	0.00899767
ENSMUSG00000001864	Aif1l	0.439206	0.0909387	4.82969	1.37e-06	8.13e-05
ENSMUSG00000012819	Cdh23	0.439114	0.134203	3.272	0.0010679	0.0182606
ENSMUSG00000033065	Pfkm	0.438948	0.0980405	4.47721	7.56e-06	0.000340002
ENSMUSG00000023764	Sfi1	0.438453	0.138989	3.15459	0.00160721	0.0248057
ENSMUSG00000064179	Tnnt1	0.435484	0.0945655	4.6051	4.12e-06	0.000206028
ENSMUSG00000021809	Nudt13	0.434915	0.143406	3.03275	0.0024234	0.0331749
ENSMUSG00000026930	Gpsm1	0.431231	0.136171	3.16684	0.00154106	0.0241307
ENSMUSG00000039153	Runx2	0.430813	0.12932	3.33138	0.000864177	0.0159576
ENSMUSG00000014195	Dnajc7	0.430051	0.135734	3.16833	0.00153315	0.0241054
ENSMUSG00000054484	Tmem62	0.42968	0.124947	3.43891	0.000584057	0.0120421
ENSMUSG00000038375	Trp53inp2	0.428977	0.0903711	4.74684	2.07e-06	0.00011573
ENSMUSG00000035722	Abca7	0.428402	0.138401	3.09537	0.00196569	0.0287226
ENSMUSG00000035296	Sgcg	0.427928	0.119339	3.58581	0.00033604	0.00776183
ENSMUSG00000034457	Eda2r	0.425164	0.124069	3.42682	0.000610684	0.0122896
ENSMUSG00000004565	Pnpla6	0.42515	0.132677	3.20439	0.00135347	0.0218518
ENSMUSG00000010608	Rbm25	0.424096	0.142023	2.98611	0.00282554	0.0370212
ENSMUSG00000028809	Srrm1	0.423214	0.123727	3.42054	0.00062496	0.0125142
ENSMUSG00000031791	Tmem38a	0.422867	0.13784	3.06781	0.00215632	0.0306746
ENSMUSG00000022564	Grina	0.419732	0.124774	3.36393	0.000768397	0.0145282
ENSMUSG00000019787	Trdn	0.418149	0.142457	2.93526	0.00333264	0.0414055
ENSMUSG00000022515	Anks3	0.417369	0.133097	3.13582	0.00171374	0.0259727
ENSMUSG00000036054	Sugp2	0.416638	0.143074	2.91204	0.00359077	0.0432533
ENSMUSG00000019944	Rhobtb1	0.416114	0.109177	3.81136	0.000138204	0.00382278
ENSMUSG00000032363	Adamts7	0.416074	0.114118	3.64602	0.000266338	0.00640498
ENSMUSG00000031885	Cbfb	0.415088	0.109296	3.79783	0.000145966	0.00400453
ENSMUSG00000026349	Ccnt2	0.414676	0.12131	3.41832	0.000630098	0.012586
ENSMUSG00000022558	Mroh1	0.413687	0.111351	3.71517	0.000203065	0.00518973
ENSMUSG00000031097	Tnni2	0.413589	0.132342	3.12515	0.00177712	0.0266627
ENSMUSG00000022508	Bcl6	0.412945	0.0970614	4.25447	2.1e-05	0.000793494
ENSMUSG00000038859	Baiap2l1	0.412558	0.101616	4.05997	4.91e-05	0.00163313
ENSMUSG00000035597	Prpf39	0.411552	0.127511	3.22758	0.00124844	0.020542
ENSMUSG00000040459	Arglu1	0.407938	0.136497	2.98861	0.00280248	0.0367549
ENSMUSG00000020190	Mknk2	0.407058	0.0955366	4.26075	2.04e-05	0.000775899
ENSMUSG00000033589	Reep4	0.406025	0.142632	2.84666	0.00441801	0.0499087
ENSMUSG00000037679	Inf2	0.405973	0.130081	3.12093	0.00180279	0.0268382
ENSMUSG00000038967	Pdk2	0.403921	0.111768	3.61393	0.000301586	0.0070631
ENSMUSG00000000031	H19	0.403659	0.108336	3.72598	0.000194557	0.0050104
ENSMUSG00000003810	Mast2	0.40117	0.11704	3.42764	0.000608852	0.0122824
ENSMUSG00000027499	Pkia	0.400081	0.138155	2.89589	0.00378082	0.0446622
ENSMUSG00000026437	Cdk18	0.399047	0.135646	2.94182	0.00326288	0.0406891
ENSMUSG00000025509	Pnpla2	0.398878	0.110052	3.62446	0.000289565	0.0068172
ENSMUSG00000026459	Myog	0.398854	0.101832	3.9168	8.97e-05	0.00269254
ENSMUSG00000031169	Porcn	0.398612	0.114535	3.48025	0.000500951	0.0106238
ENSMUSG00000004508	Gab2	0.397212	0.125144	3.17405	0.00150329	0.0236913
ENSMUSG00000028680	Plk3	0.39638	0.129927	3.05078	0.00228248	0.0319952
ENSMUSG00000024381	Bin1	0.395969	0.0893533	4.4315	9.36e-06	0.000405812
ENSMUSG00000058454	Dhcr7	0.39522	0.113429	3.4843	0.000493423	0.0105791
ENSMUSG00000030468	Siglecg	0.39512	0.119247	3.31347	0.00092146	0.0166943
ENSMUSG00000037103	Dcaf15	0.394586	0.128797	3.06362	0.00218678	0.0309441
ENSMUSG00000038178	Slc43a2	0.391532	0.120604	3.24642	0.00116866	0.0196133
ENSMUSG00000049858	Suox	0.390775	0.107965	3.61946	0.000295213	0.00692591
ENSMUSG00000042686	Jph1	0.390616	0.10382	3.76245	0.000168255	0.00445247
ENSMUSG00000040177	2310057M21Rik	0.390178	0.136161	2.86556	0.00416273	0.0477471
ENSMUSG00000014859	E2f4	0.389698	0.111982	3.48002	0.000501377	0.0106238
ENSMUSG00000069237	Fam8a1	0.389331	0.115044	3.38419	0.000713879	0.0138464
ENSMUSG00000074001	Klhl40	0.388677	0.113985	3.40991	0.000649846	0.0128092
ENSMUSG00000024833	Pola2	0.388195	0.133181	2.9148	0.00355921	0.0429888
ENSMUSG00000036450	Hif1an	0.388151	0.101775	3.81383	0.00013683	0.00379286
ENSMUSG00000068114	Ccdc134	0.38735	0.111379	3.47775	0.000505639	0.0106876
ENSMUSG00000061589	Dot1l	0.386738	0.13456	2.87409	0.00405197	0.046796
ENSMUSG00000029166	Mapre3	0.38551	0.117014	3.29455	0.000985795	0.0173003
ENSMUSG00000020205	Phlda1	0.384075	0.134488	2.85584	0.00429227	0.0488577
ENSMUSG00000039982	Dtx4	0.383498	0.108458	3.53591	0.000406367	0.00911985
ENSMUSG00000074221	Zfp568	0.38295	0.101135	3.78652	0.000152775	0.00415739
ENSMUSG00000040260	Daam2	0.382946	0.0927419	4.12916	3.64e-05	0.00129144
ENSMUSG00000055531	Cpsf6	0.382498	0.115238	3.31919	0.000902776	0.0165341
ENSMUSG00000032267	Usp28	0.381722	0.105038	3.63411	0.000278938	0.00662502
ENSMUSG00000026121	Sema4c	0.381038	0.115341	3.30357	0.000954614	0.0169076
ENSMUSG00000087591	Gm14635	0.377651	0.109964	3.43431	0.000594067	0.0121596
ENSMUSG00000036678	Aaas	0.377594	0.131506	2.87129	0.00408796	0.0471308
ENSMUSG00000030083	Abtb1	0.377182	0.125387	3.00815	0.00262846	0.0353089
ENSMUSG00000067071	Hes6	0.377026	0.12343	3.05457	0.00225383	0.0317259
ENSMUSG00000085133	B930095G15Rik	0.376837	0.120699	3.12212	0.00179552	0.0268098
ENSMUSG00000029804	Herc3	0.376622	0.129473	2.90889	0.00362712	0.043454
ENSMUSG00000004071	Cdip1	0.376504	0.11177	3.36856	0.00075561	0.0143746
ENSMUSG00000036197	Gxylt1	0.375896	0.129247	2.90835	0.00363344	0.0434559
ENSMUSG00000022438	Parvb	0.375544	0.111276	3.37489	0.000738461	0.0141614
ENSMUSG00000068744	Psrc1	0.374251	0.130814	2.86093	0.00422397	0.0482848
ENSMUSG00000051586	Mical3	0.374096	0.124939	2.99422	0.0027515	0.0362896
ENSMUSG00000021866	Anxa11	0.374066	0.113763	3.28812	0.00100858	0.0175855
ENSMUSG00000024188	Luc7l	0.373326	0.129487	2.88311	0.00393774	0.045752
ENSMUSG00000027655	Dhx35	0.37311	0.115658	3.22597	0.00125548	0.0206326
ENSMUSG00000021112	Mpp5	0.372382	0.116692	3.19115	0.00141707	0.0226413
ENSMUSG00000033060	Lmo7	0.371	0.0969124	3.82819	0.000129087	0.00361524
ENSMUSG00000031626	Sorbs2	0.370825	0.108132	3.42938	0.000604959	0.0122477
ENSMUSG00000034685	Fam171a2	0.369445	0.110217	3.35198	0.000802344	0.0150831
ENSMUSG00000038170	Pde4dip	0.367862	0.0891968	4.12417	3.72e-05	0.00131283
ENSMUSG00000022568	Scrib	0.367117	0.12494	2.93834	0.00329978	0.0410731
ENSMUSG00000039449	Prpf18	0.366908	0.0975364	3.76176	0.000168724	0.00445611
ENSMUSG00000024597	Slc12a2	0.366006	0.115721	3.16282	0.00156248	0.0243389
ENSMUSG00000004267	Eno2	0.365428	0.116325	3.14143	0.00168124	0.0256828
ENSMUSG00000005882	Uqcc1	0.363753	0.104155	3.49242	0.000478659	0.0103593
ENSMUSG00000021770	Samd8	0.362953	0.0998134	3.63631	0.000276569	0.00661551
ENSMUSG00000032594	Ip6k1	0.361358	0.119244	3.03042	0.00244213	0.0333295
ENSMUSG00000022475	Hdac7	0.360787	0.114707	3.14529	0.00165922	0.0254623
ENSMUSG00000019848	Popdc3	0.360016	0.0981167	3.66926	0.000243254	0.00595641
ENSMUSG00000024593	Megf10	0.358207	0.112144	3.19416	0.00140237	0.0224755
ENSMUSG00000029512	Ulk1	0.354777	0.11072	3.20427	0.00135405	0.0218518
ENSMUSG00000061759	Armt1	0.35461	0.115515	3.06982	0.00214187	0.0305335
ENSMUSG00000030672	Mylpf	0.354328	0.115463	3.06877	0.00214945	0.0306092
ENSMUSG00000026208	Des	0.353105	0.0928083	3.80467	0.000141994	0.00391153
ENSMUSG00000037613	Tnfrsf23	0.352842	0.106781	3.30436	0.00095194	0.0168903
ENSMUSG00000025795	Rassf3	0.350432	0.121471	2.8849	0.00391542	0.0455848
ENSMUSG00000102869	2900097C17Rik	0.347685	0.106226	3.27305	0.00106393	0.0182606
ENSMUSG00000040118	Cacna2d1	0.347396	0.106182	3.2717	0.00106904	0.0182606
ENSMUSG00000069094	Pde7a	0.347119	0.10494	3.30778	0.000940385	0.0168626
ENSMUSG00000029822	Osbpl3	0.346658	0.107374	3.22851	0.00124438	0.0205002
ENSMUSG00000025209	Twnk	0.346649	0.106917	3.24223	0.00118596	0.0198295
ENSMUSG00000053411	Cbx7	0.346151	0.116055	2.98264	0.00285778	0.0372983
ENSMUSG00000021510	Zfp729a	0.344991	0.120468	2.86376	0.00418642	0.0479778
ENSMUSG00000035268	Pkig	0.341275	0.10487	3.25425	0.00113691	0.0191283
ENSMUSG00000017400	Stac2	0.341114	0.102928	3.3141	0.00091939	0.0166872
ENSMUSG00000056328	Myh1	0.337978	0.0969528	3.48601	0.000490283	0.0105454
ENSMUSG00000002107	Celf2	0.333513	0.0987608	3.37698	0.000732856	0.014074
ENSMUSG00000085148	Mir22hg	0.333457	0.11536	2.89057	0.00384543	0.0451477
ENSMUSG00000019647	Sema6a	0.333061	0.114448	2.91015	0.00361251	0.0433598
ENSMUSG00000025358	Cdk2	0.332725	0.108266	3.07322	0.00211762	0.0303488
ENSMUSG00000011256	Adam19	0.332393	0.106836	3.11126	0.00186289	0.0276106
ENSMUSG00000004085	Map3k20	0.332297	0.109181	3.04355	0.00233808	0.0325371
ENSMUSG00000028630	Dyrk2	0.332159	0.0957341	3.4696	0.000521232	0.0109654
ENSMUSG00000020385	Clk4	0.3304	0.114746	2.87939	0.00398439	0.0462141
ENSMUSG00000004098	Col5a3	0.329592	0.113661	2.89979	0.0037341	0.0442659
ENSMUSG00000002265	Peg3	0.32941	0.0931436	3.53658	0.000405336	0.00911193
ENSMUSG00000066900	Suds3	0.328833	0.112465	2.92386	0.0034572	0.0423271
ENSMUSG00000042870	Tom1	0.327701	0.107962	3.03534	0.00240268	0.033077
ENSMUSG00000033763	Mtss2	0.327008	0.112588	2.90447	0.00367877	0.0437256
ENSMUSG00000020458	Rtn4	0.326697	0.103483	3.15702	0.00159391	0.0246287
ENSMUSG00000061315	Naca	0.326413	0.0946163	3.44987	0.000560867	0.0116469
ENSMUSG00000027868	Tbx15	0.322808	0.104104	3.10082	0.00192986	0.0283841
ENSMUSG00000062078	Qk	0.322635	0.098936	3.26105	0.00111002	0.0188171
ENSMUSG00000038205	Prkab2	0.317571	0.106953	2.96925	0.00298527	0.0384106
ENSMUSG00000062762	Ei24	0.316432	0.109238	2.89671	0.00377098	0.0445851
ENSMUSG00000030733	Sh2b1	0.315965	0.105236	3.00245	0.00267816	0.0356769
ENSMUSG00000030967	Zranb1	0.314742	0.107674	2.92311	0.0034656	0.0423913
ENSMUSG00000033159	Cnppd1	0.314157	0.105544	2.97654	0.00291522	0.0378767
ENSMUSG00000020961	Ston2	0.312562	0.102384	3.05285	0.0022668	0.031834
ENSMUSG00000006457	Actn3	0.305276	0.0889585	3.43167	0.000599879	0.012194
ENSMUSG00000061603	Akap6	0.304902	0.102974	2.96095	0.00306696	0.0390797
ENSMUSG00000022272	Myo10	0.298497	0.0985601	3.02858	0.00245705	0.0334313
ENSMUSG00000021143	Pacs2	0.297305	0.104123	2.85531	0.00429943	0.0488978
ENSMUSG00000008035	Mid1ip1	0.294131	0.0953741	3.08397	0.00204258	0.0295888
ENSMUSG00000017386	Traf4	0.293691	0.100606	2.91923	0.00350895	0.0427271
ENSMUSG00000028381	Ugcg	0.291038	0.0993515	2.92938	0.00339641	0.0419265
ENSMUSG00000005686	Ampd3	0.290246	0.0989727	2.93259	0.0033615	0.0416486
ENSMUSG00000021765	Fst	0.289073	0.100565	2.8745	0.00404672	0.0467756
ENSMUSG00000050390	C77080	0.285737	0.0957791	2.98329	0.00285164	0.0372542
ENSMUSG00000042613	Pbxip1	0.283915	0.0905002	3.13717	0.00170585	0.0259409
ENSMUSG00000032060	Cryab	0.281136	0.0954146	2.94647	0.00321429	0.0403829
ENSMUSG00000045962	Wnk1	0.278808	0.0963669	2.89319	0.00381347	0.044907
ENSMUSG00000035969	Rusc2	0.278178	0.0970179	2.86728	0.00414011	0.0475688
ENSMUSG00000039844	Rapgef1	0.277092	0.0898862	3.08269	0.00205136	0.0296341
ENSMUSG00000034341	Wbp2	0.272487	0.0948674	2.87229	0.00407509	0.0470227
ENSMUSG00000038418	Egr1	0.264656	0.0895055	2.95687	0.00310781	0.0394135
ENSMUSG00000009291	Pttg1ip	0.261681	0.0906599	2.8864	0.00389675	0.0455117
ENSMUSG00000027288	Zfp106	0.260626	0.0896845	2.90603	0.00366042	0.0436278

## Sheet: Downregulated_genes
Ensembl_ID	Gene_name	log2FoldChange	lfcSE	stat	pvalue	padj
ENSMUSG00000059796	Eif4a1	-0.259838	0.0903664	-2.87539	0.00403534	0.0466842
ENSMUSG00000001119	Col6a1	-0.260503	0.0890602	-2.92502	0.00344432	0.0422526
ENSMUSG00000022324	Matn2	-0.26147	0.0903779	-2.89307	0.00381491	0.044907
ENSMUSG00000020277	Pfkl	-0.270952	0.0900753	-3.00806	0.00262919	0.0353089
ENSMUSG00000068739	Sars	-0.271156	0.0947606	-2.86149	0.00421653	0.0482407
ENSMUSG00000027712	Anxa5	-0.272295	0.0910899	-2.98929	0.00279623	0.0367087
ENSMUSG00000040990	Sh3kbp1	-0.274039	0.0960316	-2.85363	0.00432231	0.0491165
ENSMUSG00000031835	Mbtps1	-0.278288	0.092887	-2.99598	0.00273561	0.0361246
ENSMUSG00000041133	Smc1a	-0.280576	0.0953082	-2.94388	0.00324124	0.0405397
ENSMUSG00000025246	Tbl1x	-0.283315	0.0944255	-3.00041	0.00269615	0.0357791
ENSMUSG00000027198	Ext2	-0.283353	0.0932469	-3.03874	0.0023757	0.0328227
ENSMUSG00000069833	Ahnak	-0.284185	0.0981735	-2.89472	0.00379497	0.04479
ENSMUSG00000032625	Thsd7a	-0.284912	0.0908482	-3.13613	0.00171195	0.0259727
ENSMUSG00000040618	Pck2	-0.28706	0.0892389	-3.21676	0.00129647	0.0211861
ENSMUSG00000026615	Eprs	-0.287358	0.0870208	-3.30218	0.000959365	0.0169433
ENSMUSG00000001507	Itga3	-0.296572	0.100245	-2.95846	0.00309176	0.0393213
ENSMUSG00000027540	Ptpn1	-0.297766	0.102443	-2.90663	0.0036534	0.0436169
ENSMUSG00000030536	Iqgap1	-0.299836	0.0918865	-3.26311	0.00110198	0.0187044
ENSMUSG00000020532	Acaca	-0.300787	0.0971514	-3.09607	0.00196107	0.0286982
ENSMUSG00000029103	Lrpap1	-0.302563	0.106114	-2.85129	0.00435426	0.049396
ENSMUSG00000016559	H3f3b	-0.302769	0.0969768	-3.12207	0.00179582	0.0268098
ENSMUSG00000001761	Smo	-0.303233	0.102998	-2.94408	0.00323919	0.0405397
ENSMUSG00000060036	Rpl3	-0.304258	0.106425	-2.85889	0.00425123	0.0485138
ENSMUSG00000028883	Sema3a	-0.306178	0.100887	-3.03487	0.00240641	0.033077
ENSMUSG00000020358	Hnrnpab	-0.306671	0.0939732	-3.26339	0.00110088	0.0187044
ENSMUSG00000025969	Nrp2	-0.306768	0.0926676	-3.31041	0.000931602	0.0167942
ENSMUSG00000032383	Ppib	-0.307091	0.105395	-2.91371	0.00357163	0.0431
ENSMUSG00000035107	Dcbld2	-0.307992	0.0953821	-3.22903	0.00124209	0.0205002
ENSMUSG00000036273	Lrrk2	-0.308272	0.104399	-2.95283	0.00314871	0.0398195
ENSMUSG00000004044	Cavin1	-0.308955	0.0905735	-3.4111	0.000647017	0.0127909
ENSMUSG00000026020	Nop58	-0.309316	0.0995502	-3.10713	0.00188913	0.0279072
ENSMUSG00000093904	Tomm20	-0.309345	0.103991	-2.97474	0.00293238	0.0379769
ENSMUSG00000030287	Itpr2	-0.309396	0.0998939	-3.09725	0.00195326	0.0286342
ENSMUSG00000029661	Col1a2	-0.309716	0.096616	-3.20564	0.00134762	0.0218518
ENSMUSG00000032252	Glce	-0.310225	0.10373	-2.9907	0.00278335	0.0366111
ENSMUSG00000005124	Ccn4	-0.31071	0.102355	-3.0356	0.00240058	0.033077
ENSMUSG00000061787	Rps17	-0.311792	0.107175	-2.9092	0.00362357	0.0434538
ENSMUSG00000030659	Nucb2	-0.312387	0.0982565	-3.1793	0.00147633	0.0233761
ENSMUSG00000003420	Fcgrt	-0.312641	0.107487	-2.90864	0.00363006	0.043454
ENSMUSG00000023800	Tiam2	-0.31447	0.103257	-3.04551	0.00232285	0.0323587
ENSMUSG00000030717	Nupr1	-0.314473	0.100221	-3.1378	0.00170218	0.0259283
ENSMUSG00000045763	Basp1	-0.314813	0.107883	-2.91811	0.00352157	0.0428033
ENSMUSG00000027907	S100a11	-0.315298	0.102449	-3.0776	0.00208676	0.0300024
ENSMUSG00000032431	Crtap	-0.315378	0.100668	-3.13285	0.00173118	0.0261485
ENSMUSG00000003528	Slc25a1	-0.315407	0.108877	-2.89691	0.00376854	0.0445851
ENSMUSG00000029455	Aldh2	-0.316213	0.10065	-3.14172	0.00167958	0.0256828
ENSMUSG00000041841	Rpl37	-0.317772	0.108753	-2.92196	0.00347838	0.0425064
ENSMUSG00000024501	Dpysl3	-0.317898	0.0905344	-3.51135	0.000445844	0.00982537
ENSMUSG00000033722	BC034090	-0.318235	0.0994096	-3.20125	0.00136834	0.0220559
ENSMUSG00000017754	Pltp	-0.319163	0.0962097	-3.31737	0.000908694	0.0165523
ENSMUSG00000022090	Pdlim2	-0.320053	0.101508	-3.15299	0.00161607	0.0248852
ENSMUSG00000020647	Ncoa1	-0.320607	0.106952	-2.99768	0.00272041	0.0359591
ENSMUSG00000022337	Emc2	-0.320762	0.109948	-2.9174	0.00352964	0.042842
ENSMUSG00000006931	P3h4	-0.321222	0.109832	-2.92465	0.0034484	0.0422578
ENSMUSG00000020241	Col6a2	-0.321996	0.0932664	-3.45244	0.000555548	0.0115607
ENSMUSG00000029718	Pcolce	-0.322883	0.0891444	-3.62202	0.00029231	0.0068698
ENSMUSG00000075702	Selenom	-0.323136	0.104976	-3.0782	0.00208255	0.0299741
ENSMUSG00000006728	Cdk4	-0.324102	0.108615	-2.98394	0.00284562	0.0372117
ENSMUSG00000040681	Hmgn1	-0.328547	0.0990971	-3.3154	0.000915115	0.0166467
ENSMUSG00000028194	Ddah1	-0.329264	0.112464	-2.92773	0.00341449	0.0420724
ENSMUSG00000029313	Aff1	-0.329472	0.107262	-3.07166	0.0021287	0.0304404
ENSMUSG00000001025	S100a6	-0.330864	0.114956	-2.87817	0.00399989	0.0463539
ENSMUSG00000031799	Tpm4	-0.331113	0.106658	-3.10443	0.00190644	0.028132
ENSMUSG00000001751	Naglu	-0.331908	0.116038	-2.86035	0.00423174	0.0483325
ENSMUSG00000026740	Dnajc1	-0.333113	0.109967	-3.0292	0.00245201	0.0333966
ENSMUSG00000020267	Hint1	-0.333324	0.113744	-2.93046	0.00338457	0.0418187
ENSMUSG00000056116	H2-T22	-0.333685	0.113315	-2.94475	0.00323214	0.0405314
ENSMUSG00000056201	Cfl1	-0.334161	0.105521	-3.16677	0.0015414	0.0241307
ENSMUSG00000019256	Ahr	-0.335275	0.106496	-3.14824	0.00164256	0.0252643
ENSMUSG00000029163	Emilin1	-0.335847	0.0964852	-3.48082	0.000499888	0.0106238
ENSMUSG00000036327	Qsox2	-0.337076	0.110334	-3.05504	0.00225029	0.0317199
ENSMUSG00000021806	Nid2	-0.337303	0.0933815	-3.6121	0.000303731	0.00710096
ENSMUSG00000000753	Serpinf1	-0.338094	0.0871061	-3.8814	0.000103858	0.00303528
ENSMUSG00000041781	Cpsf2	-0.33913	0.114228	-2.96889	0.00298873	0.0384106
ENSMUSG00000070327	Rnf213	-0.339528	0.113924	-2.9803	0.00287963	0.0375105
ENSMUSG00000070047	Fat1	-0.339693	0.106305	-3.19545	0.00139613	0.0224499
ENSMUSG00000025492	Ifitm3	-0.340303	0.117131	-2.90531	0.00366885	0.0436463
ENSMUSG00000027750	Postn	-0.342009	0.116035	-2.94747	0.00320384	0.0402893
ENSMUSG00000028657	Ppt1	-0.342506	0.116185	-2.94795	0.00319893	0.0402652
ENSMUSG00000005087	Cd44	-0.342536	0.094476	-3.62564	0.000288251	0.00679817
ENSMUSG00000026872	Zeb2	-0.342762	0.118195	-2.89998	0.00373188	0.0442659
ENSMUSG00000006205	Htra1	-0.342831	0.0868212	-3.94871	7.86e-05	0.00241712
ENSMUSG00000024529	Lox	-0.343158	0.109491	-3.13412	0.00172368	0.0260646
ENSMUSG00000028173	Wls	-0.343577	0.11395	-3.01516	0.00256844	0.0346314
ENSMUSG00000037852	Cpe	-0.344114	0.0962595	-3.57486	0.000350419	0.00808008
ENSMUSG00000021831	Ero1l	-0.344591	0.113914	-3.025	0.00248632	0.0336932
ENSMUSG00000025743	Sdc3	-0.345146	0.104962	-3.28829	0.00100798	0.0175855
ENSMUSG00000024538	Ppic	-0.345174	0.110577	-3.12157	0.00179889	0.0268098
ENSMUSG00000026655	Fam107b	-0.346646	0.104801	-3.30766	0.000940786	0.0168626
ENSMUSG00000035279	Ssc5d	-0.347727	0.114358	-3.0407	0.00236027	0.0327104
ENSMUSG00000028567	Txndc12	-0.347791	0.104799	-3.31866	0.000904513	0.0165398
ENSMUSG00000020256	Aldh1l2	-0.348153	0.0907037	-3.83835	0.000123862	0.00349072
ENSMUSG00000002847	Pla1a	-0.348555	0.106174	-3.28288	0.00102754	0.0178533
ENSMUSG00000020009	Ifngr1	-0.349579	0.117724	-2.96948	0.00298307	0.0384106
ENSMUSG00000074129	Rpl13a	-0.349718	0.12184	-2.87031	0.00410067	0.0472116
ENSMUSG00000046027	Stard5	-0.350043	0.120275	-2.91034	0.00361031	0.0433598
ENSMUSG00000033799	Tasor2	-0.350624	0.120671	-2.90563	0.00366518	0.0436413
ENSMUSG00000021468	Sptlc1	-0.350862	0.120178	-2.91951	0.00350577	0.0427271
ENSMUSG00000090733	Rps27	-0.351192	0.097734	-3.59334	0.000326467	0.00756671
ENSMUSG00000006498	Ptbp1	-0.351313	0.100074	-3.51053	0.000447212	0.00983939
ENSMUSG00000036545	Adamts2	-0.352164	0.101365	-3.47422	0.000512342	0.0108123
ENSMUSG00000038991	Txndc5	-0.353547	0.10603	-3.33439	0.00085488	0.0158294
ENSMUSG00000022043	Trim35	-0.353707	0.0984146	-3.59405	0.000325577	0.00755913
ENSMUSG00000043671	Dpy19l3	-0.353955	0.112448	-3.14772	0.00164552	0.0252808
ENSMUSG00000021614	Vcan	-0.35603	0.113801	-3.12853	0.00175685	0.0264471
ENSMUSG00000038900	Rpl12	-0.356416	0.115867	-3.07607	0.00209748	0.0300922
ENSMUSG00000025465	Echs1	-0.356967	0.104142	-3.42768	0.000608755	0.0122824
ENSMUSG00000060126	Tpt1	-0.357157	0.123259	-2.89762	0.00376008	0.0445345
ENSMUSG00000028032	Papss1	-0.358351	0.110693	-3.23733	0.00120653	0.0200735
ENSMUSG00000021408	Ripk1	-0.360273	0.121769	-2.95866	0.00308979	0.0393213
ENSMUSG00000019975	Ikbip	-0.360683	0.120552	-2.99193	0.0027722	0.0365002
ENSMUSG00000066113	Adamtsl1	-0.360763	0.108368	-3.32905	0.000871413	0.0160471
ENSMUSG00000024981	Acsl5	-0.362351	0.114752	-3.15768	0.00159027	0.0246008
ENSMUSG00000038372	Gmds	-0.362556	0.12579	-2.88222	0.00394886	0.0458416
ENSMUSG00000034271	Jdp2	-0.363062	0.108324	-3.35164	0.000803356	0.0150831
ENSMUSG00000016252	Atp5e	-0.363767	0.126095	-2.88486	0.00391587	0.0455848
ENSMUSG00000020180	Snrpd3	-0.364302	0.119795	-3.04104	0.0023576	0.0327071
ENSMUSG00000003429	Rps11	-0.364313	0.121335	-3.00254	0.00267735	0.0356769
ENSMUSG00000015653	Steap2	-0.364339	0.0944625	-3.85696	0.000114804	0.00327667
ENSMUSG00000022887	Masp1	-0.365469	0.0992053	-3.68397	0.000229633	0.00569549
ENSMUSG00000035064	Eef2k	-0.36578	0.112231	-3.25917	0.0011174	0.0188747
ENSMUSG00000038679	Trps1	-0.366553	0.128348	-2.85594	0.00429095	0.0488577
ENSMUSG00000050295	Foxc1	-0.366555	0.126137	-2.906	0.0036608	0.0436278
ENSMUSG00000018326	Ywhab	-0.367212	0.106644	-3.44333	0.00057459	0.0118834
ENSMUSG00000074364	Ehd2	-0.367854	0.115738	-3.17834	0.00148119	0.0234254
ENSMUSG00000028081	Rps3a1	-0.368206	0.126507	-2.91056	0.00360779	0.0433598
ENSMUSG00000029119	Man2b2	-0.368217	0.104951	-3.50847	0.00045069	0.00988358
ENSMUSG00000002395	Use1	-0.36832	0.125116	-2.94382	0.00324185	0.0405397
ENSMUSG00000021366	Hivep1	-0.368913	0.109503	-3.36899	0.00075445	0.0143746
ENSMUSG00000022864	D16Ertd472e	-0.369344	0.127655	-2.8933	0.00381211	0.044907
ENSMUSG00000022816	Fstl1	-0.370769	0.0972176	-3.81381	0.00013684	0.00379286
ENSMUSG00000028234	Rps20	-0.370813	0.112469	-3.29703	0.00097714	0.0171708
ENSMUSG00000022307	Oxr1	-0.371186	0.112337	-3.30423	0.000952378	0.0168903
ENSMUSG00000040483	Xaf1	-0.371392	0.112141	-3.31182	0.000926914	0.0167691
ENSMUSG00000018593	Sparc	-0.371422	0.0980813	-3.78687	0.000152555	0.00415739
ENSMUSG00000032046	Abhd12	-0.371535	0.105156	-3.53316	0.000410619	0.00916935
ENSMUSG00000003039	Fam32a	-0.372238	0.125957	-2.95526	0.00312402	0.0395817
ENSMUSG00000039989	Cbx4	-0.374512	0.100686	-3.71961	0.00019953	0.00511014
ENSMUSG00000062353	Gm15772	-0.374587	0.122915	-3.04754	0.00230724	0.0322362
ENSMUSG00000034573	Ptpn13	-0.374841	0.121	-3.09785	0.00194927	0.0286071
ENSMUSG00000029614	Rpl6	-0.375262	0.129812	-2.89082	0.00384241	0.0451477
ENSMUSG00000074457	S100a16	-0.376386	0.128321	-2.93315	0.00335541	0.0416486
ENSMUSG00000052942	Glis3	-0.376553	0.103549	-3.63647	0.000276395	0.00661551
ENSMUSG00000046768	Rhoj	-0.376789	0.125848	-2.994	0.0027535	0.0362896
ENSMUSG00000040824	Snrpd2	-0.377615	0.124763	-3.02665	0.00247283	0.0336119
ENSMUSG00000042182	Bend6	-0.37765	0.12393	-3.04727	0.00230927	0.0322362
ENSMUSG00000040124	Gorab	-0.377749	0.126948	-2.97562	0.00292395	0.0379042
ENSMUSG00000038349	Plcl1	-0.378303	0.126746	-2.98473	0.00283826	0.0371517
ENSMUSG00000025823	Pdia4	-0.378424	0.123223	-3.07105	0.00213307	0.0304404
ENSMUSG00000027800	Tm4sf1	-0.378775	0.124185	-3.05008	0.00228782	0.0320367
ENSMUSG00000031400	G6pdx	-0.378832	0.119826	-3.16151	0.00156953	0.0243639
ENSMUSG00000025362	Rps26	-0.379573	0.111194	-3.41362	0.000641056	0.0127293
ENSMUSG00000031274	Col4a5	-0.379667	0.0964109	-3.93801	8.22e-05	0.00252162
ENSMUSG00000063531	Sema3e	-0.380159	0.122971	-3.09146	0.00199174	0.0290087
ENSMUSG00000035376	Hacd2	-0.380246	0.127868	-2.97375	0.00294188	0.0380266
ENSMUSG00000059775	Rps26-ps1	-0.382463	0.126765	-3.01711	0.002552	0.034479
ENSMUSG00000058546	Rpl23a	-0.382984	0.12775	-2.99792	0.00271828	0.0359591
ENSMUSG00000022329	Stk3	-0.383565	0.130026	-2.94992	0.00317856	0.0400838
ENSMUSG00000048482	Bdnf	-0.383786	0.104242	-3.68169	0.000231696	0.00573606
ENSMUSG00000028495	Rps6	-0.383794	0.130291	-2.94566	0.00322262	0.0404497
ENSMUSG00000058135	Gstm1	-0.385054	0.1119	-3.44104	0.000579476	0.011966
ENSMUSG00000060802	B2m	-0.385715	0.114814	-3.35947	0.000780921	0.0147443
ENSMUSG00000102918	Pcdhgc3	-0.385903	0.119054	-3.24142	0.00118935	0.0198614
ENSMUSG00000021365	Nedd9	-0.386495	0.130298	-2.96623	0.00301475	0.0387013
ENSMUSG00000031538	Plat	-0.387786	0.121668	-3.18724	0.00143637	0.022851
ENSMUSG00000022246	Rai14	-0.388679	0.0965882	-4.02409	5.72e-05	0.00185724
ENSMUSG00000025510	Cd151	-0.389165	0.105326	-3.69487	0.00022	0.00549713
ENSMUSG00000029377	Ereg	-0.389188	0.135596	-2.87021	0.004102	0.0472116
ENSMUSG00000109946	Brd3os	-0.38974	0.127214	-3.06367	0.00218643	0.0309441
ENSMUSG00000055737	Ghr	-0.390501	0.111648	-3.4976	0.000469469	0.0101956
ENSMUSG00000034892	Rps29	-0.391096	0.120155	-3.25493	0.00113419	0.0191064
ENSMUSG00000024074	Crim1	-0.391275	0.102249	-3.82668	0.000129883	0.00362998
ENSMUSG00000090862	Rps13	-0.391646	0.124694	-3.14087	0.00168449	0.0257033
ENSMUSG00000027495	Fam210b	-0.392023	0.135849	-2.88573	0.00390503	0.0455689
ENSMUSG00000076441	Ass1	-0.392282	0.137526	-2.85243	0.0043387	0.0492611
ENSMUSG00000021065	Fut8	-0.392447	0.13061	-3.00473	0.00265815	0.0355557
ENSMUSG00000044217	Aqp5	-0.392536	0.103268	-3.80114	0.000144034	0.00395962
ENSMUSG00000034487	Poglut3	-0.394159	0.119271	-3.30472	0.000950702	0.0168903
ENSMUSG00000036256	Igfbp7	-0.394804	0.125945	-3.13472	0.00172016	0.0260407
ENSMUSG00000022205	Sub1	-0.395039	0.119342	-3.31014	0.000932498	0.0167942
ENSMUSG00000039221	Rpl22l1	-0.395192	0.135704	-2.91216	0.00358939	0.0432533
ENSMUSG00000046364	Rpl27a	-0.39546	0.123014	-3.21477	0.00130551	0.0212726
ENSMUSG00000021226	Acot2	-0.39617	0.119844	-3.30571	0.000947346	0.0168903
ENSMUSG00000034636	Zyg11b	-0.396253	0.102642	-3.86054	0.000113135	0.0032428
ENSMUSG00000028266	Lmo4	-0.396315	0.117285	-3.37909	0.000727269	0.0140187
ENSMUSG00000000326	Comt	-0.396997	0.129039	-3.07657	0.00209399	0.0300743
ENSMUSG00000018339	Gpx3	-0.397736	0.12847	-3.09594	0.00196189	0.0286982
ENSMUSG00000024548	Setbp1	-0.397872	0.105726	-3.76324	0.000167725	0.00444719
ENSMUSG00000039081	Zfp503	-0.398595	0.118027	-3.37715	0.000732424	0.014074
ENSMUSG00000030347	D6Wsu163e	-0.398716	0.13254	-3.00826	0.00262746	0.0353089
ENSMUSG00000040857	Erf	-0.399291	0.134799	-2.96212	0.00305527	0.0390235
ENSMUSG00000057147	Dph6	-0.400189	0.13629	-2.9363	0.00332149	0.041305
ENSMUSG00000041417	Pik3r1	-0.400357	0.0952095	-4.20501	2.61e-05	0.000958889
ENSMUSG00000005732	Ranbp1	-0.400532	0.131435	-3.04738	0.00230845	0.0322362
ENSMUSG00000072235	Tuba1a	-0.400983	0.136721	-2.93286	0.00335853	0.0416486
ENSMUSG00000027220	Syt13	-0.401667	0.106335	-3.77737	0.000158494	0.00426126
ENSMUSG00000040675	Mthfd1l	-0.401716	0.111745	-3.59493	0.000324481	0.0075467
ENSMUSG00000016494	Cd34	-0.401785	0.0916254	-4.38508	1.16e-05	0.000481056
ENSMUSG00000002768	Mea1	-0.402452	0.108449	-3.71096	0.000206472	0.00523699
ENSMUSG00000100801	Gm15459	-0.402911	0.135486	-2.97381	0.00294125	0.0380266
ENSMUSG00000053219	Raet1e	-0.403622	0.12566	-3.21201	0.00131811	0.0214261
ENSMUSG00000021109	Hif1a	-0.403639	0.121662	-3.3177	0.000907625	0.0165523
ENSMUSG00000037411	Serpine1	-0.404118	0.131817	-3.06575	0.00217126	0.0308545
ENSMUSG00000073139	Tmem185a	-0.404985	0.136751	-2.96147	0.0030617	0.0390497
ENSMUSG00000014599	Csf1	-0.405598	0.099736	-4.06671	4.77e-05	0.00160645
ENSMUSG00000031380	Vegfd	-0.405859	0.0991843	-4.09196	4.28e-05	0.0014706
ENSMUSG00000028757	Ddost	-0.406374	0.130745	-3.10813	0.00188273	0.0278433
ENSMUSG00000032733	Snx33	-0.406942	0.108692	-3.744	0.000181116	0.00473686
ENSMUSG00000041238	Rbbp8	-0.407007	0.132457	-3.07274	0.00212105	0.0303655
ENSMUSG00000025150	Cbr2	-0.407248	0.125702	-3.2398	0.00119613	0.0199252
ENSMUSG00000032715	Trib3	-0.40888	0.0909351	-4.49639	6.91e-06	0.000318191
ENSMUSG00000030498	Gas2	-0.409631	0.120858	-3.38936	0.000700554	0.013673
ENSMUSG00000071637	Cebpd	-0.409649	0.130319	-3.14344	0.00166973	0.0255651
ENSMUSG00000034932	Mrpl54	-0.409695	0.140705	-2.91173	0.00359435	0.0432577
ENSMUSG00000025381	Cnpy2	-0.409972	0.126539	-3.23988	0.00119582	0.0199252
ENSMUSG00000052395	Rft1	-0.41024	0.122756	-3.34193	0.000831987	0.0154909
ENSMUSG00000046731	Kctd11	-0.410993	0.116448	-3.52941	0.000416492	0.00923912
ENSMUSG00000032372	Plscr2	-0.411955	0.124402	-3.31147	0.000928082	0.0167691
ENSMUSG00000032243	Itga11	-0.411973	0.10695	-3.85202	0.000117145	0.00332936
ENSMUSG00000022971	Ifnar2	-0.413446	0.122001	-3.38887	0.000701805	0.013673
ENSMUSG00000004885	Crabp2	-0.413607	0.0957023	-4.3218	1.55e-05	0.000603028
ENSMUSG00000051457	Spn	-0.413848	0.143106	-2.89189	0.00382934	0.0450375
ENSMUSG00000031451	Gas6	-0.4143	0.0983128	-4.2141	2.51e-05	0.000923609
ENSMUSG00000046330	Rpl37a	-0.414643	0.126093	-3.2884	0.00100759	0.0175855
ENSMUSG00000029810	Tmem176b	-0.41555	0.12429	-3.34339	0.000827618	0.0154309
ENSMUSG00000063873	Slc24a3	-0.416273	0.120673	-3.4496	0.000561424	0.0116469
ENSMUSG00000031379	Pir	-0.416394	0.137243	-3.034	0.00241336	0.0330981
ENSMUSG00000008682	Rpl10	-0.416416	0.138873	-2.99853	0.00271283	0.0359341
ENSMUSG00000022146	Osmr	-0.416921	0.0967994	-4.30706	1.65e-05	0.000639088
ENSMUSG00000028843	Sh3bgrl3	-0.417613	0.112506	-3.71192	0.000205692	0.0052275
ENSMUSG00000019846	Lama4	-0.417888	0.106204	-3.93476	8.33e-05	0.00254435
ENSMUSG00000057841	Rpl32	-0.418642	0.122011	-3.43117	0.000600983	0.012194
ENSMUSG00000090523	Gypc	-0.419101	0.11837	-3.5406	0.000399219	0.00900454
ENSMUSG00000070436	Serpinh1	-0.419327	0.108338	-3.87055	0.000108588	0.00315964
ENSMUSG00000037805	Rpl10a	-0.419388	0.118953	-3.52567	0.000422408	0.00935492
ENSMUSG00000048706	Lurap1l	-0.420679	0.104114	-4.04056	5.33e-05	0.00175266
ENSMUSG00000079641	Rpl39	-0.420813	0.130162	-3.23298	0.00122506	0.0203063
ENSMUSG00000039001	Rps21	-0.421722	0.112501	-3.7486	0.000177828	0.00465992
ENSMUSG00000062991	Nrg1	-0.421831	0.0958488	-4.401	1.08e-05	0.000459843
ENSMUSG00000054150	Syne3	-0.422361	0.139582	-3.02589	0.00247898	0.0336616
ENSMUSG00000002808	Epdr1	-0.42258	0.125066	-3.37885	0.000727893	0.0140187
ENSMUSG00000037361	Sf3b6	-0.422894	0.138327	-3.0572	0.00223412	0.0315475
ENSMUSG00000038168	P3h2	-0.423119	0.102295	-4.13625	3.53e-05	0.00125547
ENSMUSG00000061119	Prcp	-0.423434	0.138677	-3.05339	0.00226271	0.0318176
ENSMUSG00000038412	Higd1a	-0.424337	0.1312	-3.23426	0.00121957	0.0202403
ENSMUSG00000026727	Rsu1	-0.424417	0.131995	-3.2154	0.00130265	0.0212519
ENSMUSG00000018377	Vezf1	-0.425587	0.136424	-3.11959	0.00181106	0.0269315
ENSMUSG00000066607	Insyn1	-0.426371	0.104556	-4.07793	4.54e-05	0.00154639
ENSMUSG00000024785	Rcl1	-0.428477	0.130775	-3.27646	0.00105119	0.01814
ENSMUSG00000025260	Hsd17b10	-0.429126	0.11754	-3.65089	0.000261329	0.0063287
ENSMUSG00000039693	Msantd3	-0.430098	0.13232	-3.25045	0.00115224	0.0193619
ENSMUSG00000063524	Eno1	-0.432665	0.1426	-3.03412	0.0024124	0.0330981
ENSMUSG00000022336	Eif3e	-0.432871	0.135732	-3.18917	0.00142682	0.0227529
ENSMUSG00000052698	Tln2	-0.434632	0.0981225	-4.42948	9.45e-06	0.0004083
ENSMUSG00000027460	Angpt4	-0.434641	0.111078	-3.91293	9.12e-05	0.00272997
ENSMUSG00000062006	Rpl34	-0.434763	0.136229	-3.19141	0.00141578	0.0226413
ENSMUSG00000031283	Chrdl1	-0.436494	0.146014	-2.98939	0.00279532	0.0367087
ENSMUSG00000097789	Gm2115	-0.437437	0.110605	-3.95496	7.65e-05	0.00236665
ENSMUSG00000067818	Myl9	-0.437584	0.138129	-3.16794	0.00153523	0.0241099
ENSMUSG00000023191	P3h3	-0.438493	0.114461	-3.83095	0.000127648	0.0035824
ENSMUSG00000006442	Srm	-0.439045	0.103978	-4.22249	2.42e-05	0.000897262
ENSMUSG00000011752	Pgam1	-0.439559	0.132871	-3.30817	0.000939092	0.0168626
ENSMUSG00000038530	Rgs4	-0.439756	0.126306	-3.48168	0.000498285	0.0106238
ENSMUSG00000017144	Rnd3	-0.440271	0.0965659	-4.55928	5.13e-06	0.000247325
ENSMUSG00000051048	P4ha3	-0.440729	0.129249	-3.40992	0.000649819	0.0128092
ENSMUSG00000005893	Nr2c2	-0.441295	0.14174	-3.1134	0.00184943	0.0274414
ENSMUSG00000020528	Prpsap2	-0.442078	0.131389	-3.36466	0.000766371	0.0145103
ENSMUSG00000016206	H2-M3	-0.44323	0.151998	-2.91601	0.00354534	0.0428982
ENSMUSG00000043943	Naalad2	-0.443305	0.114556	-3.86976	0.000108943	0.00316237
ENSMUSG00000027223	Mapk8ip1	-0.443747	0.113544	-3.90814	9.3e-05	0.00276615
ENSMUSG00000020056	Washc3	-0.444419	0.125277	-3.54748	0.000388931	0.0088617
ENSMUSG00000042215	Bag2	-0.444713	0.105838	-4.20184	2.65e-05	0.000969772
ENSMUSG00000035131	Brinp3	-0.445502	0.125762	-3.54241	0.000396482	0.00899767
ENSMUSG00000067780	Pi15	-0.445787	0.144579	-3.08334	0.00204691	0.0296196
ENSMUSG00000060594	Layn	-0.446122	0.15058	-2.96269	0.00304962	0.0390068
ENSMUSG00000031871	Cdh5	-0.446671	0.135418	-3.29847	0.000972124	0.0171275
ENSMUSG00000048234	Rnf149	-0.446674	0.13407	-3.33163	0.000863383	0.0159576
ENSMUSG00000028179	Cth	-0.446887	0.102297	-4.3685	1.25e-05	0.00050808
ENSMUSG00000062190	Lancl2	-0.447868	0.154019	-2.90787	0.00363899	0.0434835
ENSMUSG00000073987	Ggh	-0.448387	0.137516	-3.26062	0.00111168	0.0188215
ENSMUSG00000071866	Ppia	-0.448657	0.139771	-3.20995	0.00132756	0.0215537
ENSMUSG00000074934	Grem1	-0.449043	0.110656	-4.05799	4.95e-05	0.00164294
ENSMUSG00000025289	Prdx4	-0.450072	0.121831	-3.69424	0.000220544	0.00550051
ENSMUSG00000032561	Acpp	-0.450659	0.116572	-3.86592	0.000110669	0.0031857
ENSMUSG00000079575	Rbpj-ps3	-0.450702	0.138977	-3.24299	0.00118281	0.0198014
ENSMUSG00000061983	Rps12	-0.45097	0.123161	-3.66162	0.000250625	0.00610354
ENSMUSG00000008683	Rps15a	-0.451015	0.134497	-3.35335	0.000798387	0.0150318
ENSMUSG00000028926	Cdk14	-0.451201	0.115063	-3.92134	8.81e-05	0.00265421
ENSMUSG00000025198	Erlin1	-0.451271	0.106128	-4.25215	2.12e-05	0.000799499
ENSMUSG00000062328	Rpl17	-0.452043	0.130516	-3.4635	0.00053319	0.011182
ENSMUSG00000036078	Sigmar1	-0.452454	0.128017	-3.53433	0.000408804	0.00914401
ENSMUSG00000062210	Tnfaip8	-0.45284	0.145918	-3.1034	0.00191314	0.0281999
ENSMUSG00000022754	Tmem45a	-0.452967	0.149519	-3.0295	0.00244961	0.0333966
ENSMUSG00000040613	Apobec1	-0.453286	0.134434	-3.3718	0.000746778	0.0142801
ENSMUSG00000024066	Xdh	-0.45339	0.120371	-3.7666	0.000165483	0.00440808
ENSMUSG00000041180	Hectd2	-0.45454	0.155353	-2.92585	0.00343519	0.0422526
ENSMUSG00000020738	Sumo2	-0.455835	0.135901	-3.35417	0.000796027	0.0150084
ENSMUSG00000039883	Lrrc17	-0.455989	0.124014	-3.67692	0.000236067	0.00581217
ENSMUSG00000028344	Invs	-0.45661	0.128951	-3.54095	0.000398689	0.00900454
ENSMUSG00000021388	Aspn	-0.457638	0.154504	-2.96197	0.00305674	0.0390235
ENSMUSG00000039197	Adk	-0.458895	0.14	-3.27783	0.00104608	0.0180984
ENSMUSG00000074746	Pdzd8	-0.459436	0.102728	-4.47236	7.74e-06	0.000346657
ENSMUSG00000023046	Igfbp6	-0.459633	0.11879	-3.86929	0.000109153	0.00316237
ENSMUSG00000020019	Ntn4	-0.459811	0.117884	-3.90054	9.6e-05	0.00284819
ENSMUSG00000001707	Eef1e1	-0.459895	0.152338	-3.01891	0.00253687	0.0343436
ENSMUSG00000078974	Sec61g	-0.460449	0.121281	-3.79654	0.000146729	0.0040091
ENSMUSG00000027737	Slc7a11	-0.460955	0.123334	-3.73745	0.000185894	0.00482426
ENSMUSG00000042770	Hebp1	-0.461512	0.139751	-3.3024	0.000958624	0.0169433
ENSMUSG00000035864	Syt1	-0.461596	0.139968	-3.29786	0.000974251	0.0171425
ENSMUSG00000034957	Cebpa	-0.462054	0.155623	-2.96905	0.00298719	0.0384106
ENSMUSG00000030744	Rps3	-0.463254	0.139299	-3.32561	0.000882259	0.0162246
ENSMUSG00000028487	Bnc2	-0.46352	0.150928	-3.07112	0.00213255	0.0304404
ENSMUSG00000022261	Sdc2	-0.464156	0.107063	-4.33537	1.46e-05	0.000580469
ENSMUSG00000094344	Gm11942	-0.466054	0.106406	-4.37997	1.19e-05	0.000487869
ENSMUSG00000037375	Hhat	-0.467693	0.155976	-2.99849	0.00271317	0.0359341
ENSMUSG00000025026	Add3	-0.467837	0.143303	-3.26466	0.00109595	0.0186492
ENSMUSG00000024659	Anxa1	-0.471068	0.129917	-3.6259	0.000287957	0.00679817
ENSMUSG00000049791	Fzd4	-0.471425	0.107215	-4.397	1.1e-05	0.000465216
ENSMUSG00000038521	C1s1	-0.47199	0.0994522	-4.7459	2.08e-06	0.000115789
ENSMUSG00000037112	Sik2	-0.472647	0.163689	-2.88748	0.00388346	0.0454634
ENSMUSG00000046191	Pcdhb20	-0.475423	0.138301	-3.43761	0.000586878	0.0120633
ENSMUSG00000046572	Zfp518b	-0.475549	0.150411	-3.16166	0.00156874	0.0243639
ENSMUSG00000000594	Gm2a	-0.477189	0.140804	-3.38903	0.000701404	0.013673
ENSMUSG00000084349	Rpl3-ps1	-0.477333	0.131342	-3.63427	0.000278774	0.00662502
ENSMUSG00000072941	Sod3	-0.477487	0.103093	-4.63159	3.63e-06	0.000185478
ENSMUSG00000053846	Lipg	-0.478084	0.119456	-4.00217	6.28e-05	0.00198998
ENSMUSG00000046814	Gchfr	-0.478374	0.149288	-3.20437	0.00135361	0.0218518
ENSMUSG00000041482	Piezo2	-0.480005	0.118458	-4.05211	5.08e-05	0.00167236
ENSMUSG00000036334	Igsf10	-0.480438	0.11754	-4.08745	4.36e-05	0.00149186
ENSMUSG00000048920	Fkrp	-0.480676	0.147593	-3.25678	0.00112685	0.0190066
ENSMUSG00000031827	Cotl1	-0.481332	0.150671	-3.1946	0.00140025	0.0224755
ENSMUSG00000000184	Ccnd2	-0.481823	0.10672	-4.51485	6.34e-06	0.000293717
ENSMUSG00000027447	Cst3	-0.481919	0.130932	-3.68069	0.000232605	0.00574799
ENSMUSG00000042115	Klhdc8a	-0.483192	0.121262	-3.98468	6.76e-05	0.00213229
ENSMUSG00000022750	Klhl22	-0.483729	0.129348	-3.73976	0.000184199	0.00479882
ENSMUSG00000034118	Tpst1	-0.483844	0.110962	-4.36046	1.3e-05	0.000522392
ENSMUSG00000115338	Pnp	-0.483918	0.137318	-3.52407	0.000424965	0.00939606
ENSMUSG00000026576	Atp1b1	-0.483996	0.110957	-4.362	1.29e-05	0.000521842
ENSMUSG00000009614	Sardh	-0.485339	0.116908	-4.15147	3.3e-05	0.00118107
ENSMUSG00000012609	Ttll5	-0.485526	0.104319	-4.65424	3.25e-06	0.000169437
ENSMUSG00000030116	Mfap5	-0.485675	0.109193	-4.44784	8.67e-06	0.000379808
ENSMUSG00000056214	Pard6g	-0.487093	0.166735	-2.92135	0.00348516	0.0425146
ENSMUSG00000021751	Acox2	-0.48766	0.151572	-3.21735	0.00129383	0.021185
ENSMUSG00000005803	Sqor	-0.487825	0.131932	-3.69754	0.000217695	0.00544967
ENSMUSG00000032440	Tgfbr2	-0.488398	0.104706	-4.66449	3.09e-06	0.000163103
ENSMUSG00000020654	Adcy3	-0.488893	0.165271	-2.95813	0.00309509	0.0393264
ENSMUSG00000027962	Vcam1	-0.488979	0.111656	-4.37934	1.19e-05	0.000487869
ENSMUSG00000031253	Srpx2	-0.489295	0.115274	-4.24464	2.19e-05	0.000822146
ENSMUSG00000067276	Capn6	-0.489329	0.125472	-3.89991	9.62e-05	0.00284935
ENSMUSG00000056234	Ncoa4	-0.491319	0.149598	-3.28426	0.00102252	0.0178054
ENSMUSG00000021367	Edn1	-0.491934	0.11174	-4.40249	1.07e-05	0.000458151
ENSMUSG00000040021	Lats1	-0.492258	0.160603	-3.06506	0.00217629	0.0308933
ENSMUSG00000032036	Kirrel3	-0.49336	0.108915	-4.52979	5.9e-06	0.000277517
ENSMUSG00000041559	Fmod	-0.49339	0.104861	-4.70518	2.54e-06	0.000138047
ENSMUSG00000001289	Pfdn5	-0.49374	0.130568	-3.78147	0.000155902	0.00421689
ENSMUSG00000032231	Anxa2	-0.494505	0.0958327	-5.16009	2.47e-07	1.84e-05
ENSMUSG00000025355	Mmp19	-0.494868	0.127402	-3.8843	0.000102624	0.00301216
ENSMUSG00000039217	Il18	-0.495448	0.15143	-3.27179	0.00106871	0.0182606
ENSMUSG00000060938	Rpl26	-0.495465	0.139562	-3.55013	0.000385038	0.0087879
ENSMUSG00000022801	Lrch3	-0.498841	0.143354	-3.47978	0.00050183	0.0106238
ENSMUSG00000040420	Cdh18	-0.499991	0.113962	-4.38736	1.15e-05	0.000478878
ENSMUSG00000030074	Gxylt2	-0.500372	0.131508	-3.80488	0.000141873	0.00391153
ENSMUSG00000021835	Bmp4	-0.500836	0.104834	-4.77743	1.78e-06	0.000101566
ENSMUSG00000002289	Angptl4	-0.501914	0.145999	-3.43778	0.000586497	0.0120633
ENSMUSG00000003955	Fam162a	-0.502261	0.141173	-3.55777	0.000374017	0.00856544
ENSMUSG00000070044	Fam149a	-0.50393	0.113494	-4.44014	8.99e-06	0.000391101
ENSMUSG00000066571	4931406P16Rik	-0.504894	0.151918	-3.32347	0.000889061	0.0163274
ENSMUSG00000070469	Adamtsl3	-0.505468	0.100236	-5.04276	4.59e-07	3.28e-05
ENSMUSG00000052396	Mogat2	-0.506554	0.158062	-3.20478	0.00135164	0.0218518
ENSMUSG00000024053	Emilin2	-0.507986	0.103224	-4.92122	8.6e-07	5.4e-05
ENSMUSG00000016194	Hsd11b1	-0.509305	0.134146	-3.79664	0.00014667	0.0040091
ENSMUSG00000004655	Aqp1	-0.509561	0.1542	-3.30454	0.000951331	0.0168903
ENSMUSG00000071856	Mcc	-0.510087	0.176819	-2.8848	0.00391657	0.0455848
ENSMUSG00000055368	Slc6a2	-0.51095	0.103696	-4.92737	8.33e-07	5.34e-05
ENSMUSG00000035048	Anapc13	-0.512272	0.119802	-4.27598	1.9e-05	0.000728821
ENSMUSG00000079343	C1s2	-0.51251	0.139998	-3.66083	0.0002514	0.00611134
ENSMUSG00000020432	Tcn2	-0.513271	0.148254	-3.46212	0.000535948	0.0112162
ENSMUSG00000051355	Commd1	-0.51516	0.15399	-3.34541	0.000821616	0.0153605
ENSMUSG00000041556	Fbxo2	-0.517165	0.167156	-3.09391	0.00197538	0.0288015
ENSMUSG00000027207	Galk2	-0.520009	0.14185	-3.6659	0.000246469	0.00601323
ENSMUSG00000022253	Nadk2	-0.520076	0.140427	-3.70352	0.000212625	0.00535264
ENSMUSG00000021728	Emb	-0.520346	0.177898	-2.92498	0.00344483	0.0422526
ENSMUSG00000015652	Steap1	-0.521752	0.103871	-5.02309	5.08e-07	3.58e-05
ENSMUSG00000047434	Xxylt1	-0.521842	0.111347	-4.68664	2.78e-06	0.000148745
ENSMUSG00000020758	Itgb4	-0.522968	0.176322	-2.96599	0.0030171	0.0387013
ENSMUSG00000031209	Heph	-0.522977	0.155228	-3.36909	0.000754162	0.0143746
ENSMUSG00000026574	Dpt	-0.523642	0.122065	-4.28985	1.79e-05	0.000688684
ENSMUSG00000046229	Scand1	-0.523707	0.147967	-3.53935	0.000401106	0.00903195
ENSMUSG00000046546	Fam43a	-0.524157	0.139196	-3.76559	0.000166156	0.00441431
ENSMUSG00000040713	Creg1	-0.524703	0.140533	-3.73365	0.000188725	0.0048789
ENSMUSG00000027843	Ptpn22	-0.530396	0.167828	-3.16036	0.00157575	0.0244202
ENSMUSG00000028583	Pdpn	-0.5306	0.149596	-3.54688	0.000389819	0.0088669
ENSMUSG00000032788	Pdxk	-0.531288	0.154847	-3.43105	0.000601253	0.012194
ENSMUSG00000073530	Pappa2	-0.53198	0.10776	-4.93673	7.94e-07	5.13e-05
ENSMUSG00000042254	Cilp	-0.532463	0.121113	-4.39642	1.1e-05	0.000465216
ENSMUSG00000001020	S100a4	-0.535334	0.133119	-4.02146	5.78e-05	0.00187351
ENSMUSG00000063856	Gpx1	-0.536291	0.117455	-4.56593	4.97e-06	0.000241336
ENSMUSG00000031639	Tlr3	-0.53647	0.18	-2.98039	0.00287881	0.0375105
ENSMUSG00000032806	Slc10a3	-0.538381	0.164374	-3.27534	0.00105535	0.0181885
ENSMUSG00000027995	Tlr2	-0.538559	0.112897	-4.77034	1.84e-06	0.000104318
ENSMUSG00000102602	A930004J17Rik	-0.539414	0.174989	-3.08255	0.00205232	0.0296341
ENSMUSG00000028007	Snx7	-0.540693	0.144693	-3.73683	0.000186356	0.00482694
ENSMUSG00000006369	Fbln1	-0.541316	0.130029	-4.16304	3.14e-05	0.00113788
ENSMUSG00000024725	Ostf1	-0.543737	0.117605	-4.62341	3.77e-06	0.000191488
ENSMUSG00000037161	Mgarp	-0.544253	0.186607	-2.91657	0.00353908	0.0428611
ENSMUSG00000029446	Psph	-0.544999	0.105851	-5.14874	2.62e-07	1.94e-05
ENSMUSG00000032348	Gsta4	-0.545464	0.138552	-3.93688	8.25e-05	0.00252777
ENSMUSG00000038463	Olfml2b	-0.546779	0.116426	-4.69636	2.65e-06	0.000143559
ENSMUSG00000034127	Tspan8	-0.549372	0.150592	-3.64807	0.000264218	0.00637681
ENSMUSG00000039236	Isg20	-0.550538	0.145742	-3.77748	0.000158421	0.00426126
ENSMUSG00000057457	Phex	-0.552035	0.137774	-4.00682	6.15e-05	0.00195579
ENSMUSG00000079018	Ly6c1	-0.553723	0.161237	-3.43421	0.000594276	0.0121596
ENSMUSG00000004473	Clec11a	-0.555362	0.160596	-3.45813	0.00054393	0.0113365
ENSMUSG00000073647	Gm10557	-0.557586	0.161824	-3.44563	0.00056974	0.0118013
ENSMUSG00000044674	Fzd1	-0.561732	0.115317	-4.87122	1.11e-06	6.75e-05
ENSMUSG00000031292	Cdkl5	-0.562515	0.177529	-3.16858	0.00153188	0.0241054
ENSMUSG00000039497	Dse	-0.563361	0.122166	-4.61144	4e-06	0.00020134
ENSMUSG00000010311	Optc	-0.566143	0.186425	-3.03684	0.00239072	0.0329964
ENSMUSG00000082536	Gm13456	-0.568132	0.192129	-2.95704	0.00310611	0.0394135
ENSMUSG00000028532	Cachd1	-0.568469	0.136627	-4.16073	3.17e-05	0.00114024
ENSMUSG00000009633	G0s2	-0.570117	0.0988288	-5.76873	7.99e-09	8.2e-07
ENSMUSG00000028167	Bdh2	-0.571693	0.190425	-3.00219	0.00268048	0.0356769
ENSMUSG00000027559	Car3	-0.573964	0.182575	-3.14372	0.00166814	0.0255651
ENSMUSG00000028497	Hacd4	-0.573973	0.132738	-4.32412	1.53e-05	0.000601959
ENSMUSG00000055725	Paqr3	-0.577142	0.143573	-4.01986	5.82e-05	0.0018773
ENSMUSG00000003032	Klf4	-0.578471	0.103987	-5.56293	2.65e-08	2.44e-06
ENSMUSG00000097245	Gm5421	-0.578619	0.190245	-3.04143	0.00235456	0.0326987
ENSMUSG00000066026	Dhrs3	-0.581002	0.110946	-5.23679	1.63e-07	1.27e-05
ENSMUSG00000027971	Ndst4	-0.585384	0.198428	-2.9501	0.0031767	0.0400838
ENSMUSG00000029570	Lfng	-0.587261	0.2005	-2.92899	0.00340067	0.0419405
ENSMUSG00000004500	Zfp324	-0.589279	0.199586	-2.9525	0.00315214	0.0398254
ENSMUSG00000020354	Sgcd	-0.590316	0.150176	-3.93083	8.47e-05	0.00258052
ENSMUSG00000083022	Rps15a-ps6	-0.590418	0.199273	-2.96286	0.003048	0.0390068
ENSMUSG00000027335	Adra1d	-0.591285	0.159421	-3.70896	0.000208114	0.0052687
ENSMUSG00000034903	Cobll1	-0.592021	0.145274	-4.07519	4.6e-05	0.00156076
ENSMUSG00000099397	Gm7809	-0.592178	0.205837	-2.87693	0.0040156	0.0464958
ENSMUSG00000038527	C1rl	-0.593201	0.132949	-4.46187	8.12e-06	0.000362856
ENSMUSG00000049929	Lpar4	-0.593771	0.130929	-4.53507	5.76e-06	0.000273532
ENSMUSG00000037892	Pcdh18	-0.594614	0.123063	-4.83178	1.35e-06	8.12e-05
ENSMUSG00000053317	Sec61b	-0.5954	0.144917	-4.10855	3.98e-05	0.00138304
ENSMUSG00000055301	Adh7	-0.597366	0.125686	-4.75285	2.01e-06	0.000112812
ENSMUSG00000044788	Fads6	-0.598298	0.155029	-3.85926	0.00011373	0.00325293
ENSMUSG00000019866	Crybg1	-0.599289	0.112618	-5.32144	1.03e-07	8.34e-06
ENSMUSG00000019832	Rab32	-0.599707	0.176909	-3.38991	0.000699146	0.013673
ENSMUSG00000047139	Cd24a	-0.602492	0.208466	-2.89012	0.00385092	0.0451727
ENSMUSG00000024646	Cyb5a	-0.603211	0.154932	-3.89338	9.89e-05	0.00291436
ENSMUSG00000096001	2610528A11Rik	-0.603531	0.139467	-4.32741	1.51e-05	0.000595493
ENSMUSG00000106951	5930430L01Rik	-0.604796	0.209715	-2.88389	0.00392791	0.0456773
ENSMUSG00000027859	Ngf	-0.607505	0.174904	-3.47336	0.000513987	0.01083
ENSMUSG00000038422	Hdhd3	-0.611008	0.176182	-3.46804	0.000524259	0.0110119
ENSMUSG00000036867	Smad6	-0.61135	0.180668	-3.38383	0.000714825	0.0138464
ENSMUSG00000044022	Pcdhb21	-0.612411	0.175373	-3.49205	0.00047932	0.0103593
ENSMUSG00000058571	Gpc6	-0.612962	0.124461	-4.92492	8.44e-07	5.35e-05
ENSMUSG00000055172	C1ra	-0.614859	0.116357	-5.28426	1.26e-07	1.02e-05
ENSMUSG00000029126	Nsg1	-0.616445	0.104741	-5.88541	3.97e-09	4.45e-07
ENSMUSG00000037499	Nenf	-0.61725	0.134839	-4.57768	4.7e-06	0.000228996
ENSMUSG00000031342	Gpm6b	-0.617334	0.122638	-5.03379	4.81e-07	3.42e-05
ENSMUSG00000041220	Elovl6	-0.617769	0.128168	-4.82001	1.44e-06	8.43e-05
ENSMUSG00000070867	Trabd2b	-0.618	0.159753	-3.86848	0.000109518	0.00316613
ENSMUSG00000027208	Fgf7	-0.618014	0.133013	-4.64626	3.38e-06	0.000174092
ENSMUSG00000039578	Ccser1	-0.619716	0.180906	-3.42563	0.000613381	0.0123254
ENSMUSG00000022836	Mylk	-0.623434	0.115224	-5.41062	6.28e-08	5.28e-06
ENSMUSG00000031877	Ces2g	-0.624377	0.0999784	-6.24512	4.23e-10	5.75e-08
ENSMUSG00000022032	Scara5	-0.626845	0.0969219	-6.46753	9.96e-11	1.58e-08
ENSMUSG00000084319	Tpt1-ps3	-0.627297	0.182833	-3.43098	0.0006014	0.012194
ENSMUSG00000084416	Rpl10a-ps1	-0.627676	0.182938	-3.43109	0.000601156	0.012194
ENSMUSG00000079057	Cyp4v3	-0.628148	0.198652	-3.16206	0.0015666	0.0243639
ENSMUSG00000036904	Fzd8	-0.628997	0.207333	-3.03375	0.00241532	0.0330981
ENSMUSG00000033880	Lgals3bp	-0.63017	0.114888	-5.48506	4.13e-08	3.66e-06
ENSMUSG00000078572	Ndufaf8	-0.630712	0.18488	-3.41147	0.000646124	0.0127909
ENSMUSG00000084403	Rps15a-ps8	-0.631176	0.175159	-3.60344	0.000314035	0.0073219
ENSMUSG00000020053	Igf1	-0.632341	0.107145	-5.90171	3.6e-09	4.06e-07
ENSMUSG00000037010	Apln	-0.633105	0.104992	-6.03003	1.64e-09	2.06e-07
ENSMUSG00000020387	Jade2	-0.633728	0.166091	-3.81555	0.000135881	0.00378189
ENSMUSG00000032184	Lysmd2	-0.634668	0.186899	-3.39578	0.000684343	0.0134105
ENSMUSG00000017417	Plxdc1	-0.636027	0.211645	-3.00515	0.00265448	0.035542
ENSMUSG00000039621	Prex1	-0.6384	0.200264	-3.18778	0.00143368	0.0228352
ENSMUSG00000053101	Gpr141	-0.641449	0.19011	-3.37409	0.000740595	0.0141821
ENSMUSG00000042367	Gjb3	-0.641849	0.181738	-3.53173	0.000412843	0.00920373
ENSMUSG00000014782	Plekhg4	-0.642214	0.131574	-4.88101	1.06e-06	6.45e-05
ENSMUSG00000041959	S100a10	-0.643898	0.123228	-5.22528	1.74e-07	1.34e-05
ENSMUSG00000064373	Selenop	-0.643966	0.162204	-3.97009	7.18e-05	0.0022461
ENSMUSG00000057751	Megf6	-0.644444	0.100857	-6.38967	1.66e-10	2.48e-08
ENSMUSG00000027776	Il12a	-0.647181	0.203882	-3.17429	0.00150206	0.0236913
ENSMUSG00000037060	Cavin3	-0.651708	0.146149	-4.45919	8.23e-06	0.000366107
ENSMUSG00000006800	Sulf2	-0.652394	0.0928507	-7.02627	2.12e-12	5.09e-10
ENSMUSG00000075602	Ly6a	-0.653453	0.130453	-5.0091	5.47e-07	3.75e-05
ENSMUSG00000031273	Col4a6	-0.654147	0.145653	-4.49113	7.08e-06	0.000322839
ENSMUSG00000039457	Ppl	-0.656533	0.18719	-3.50731	0.000452667	0.0098965
ENSMUSG00000075028	Prdm11	-0.65926	0.212674	-3.09986	0.00193609	0.0284447
ENSMUSG00000025185	Loxl4	-0.660439	0.121858	-5.41973	5.97e-08	5.07e-06
ENSMUSG00000106099	Gm42664	-0.661084	0.218103	-3.03107	0.00243692	0.0332923
ENSMUSG00000047557	Lxn	-0.661767	0.170521	-3.88086	0.000104089	0.00303529
ENSMUSG00000001123	Lgals9	-0.666209	0.139611	-4.77191	1.82e-06	0.00010395
ENSMUSG00000022299	Slc25a32	-0.667872	0.194514	-3.43354	0.000595756	0.0121714
ENSMUSG00000019326	Aoc3	-0.671223	0.117283	-5.72311	1.05e-08	1.06e-06
ENSMUSG00000034066	Farp2	-0.671942	0.174993	-3.83982	0.000123125	0.00348457
ENSMUSG00000107709	9430018G01Rik	-0.673147	0.215311	-3.12639	0.00176966	0.0266103
ENSMUSG00000071847	Apcdd1	-0.673246	0.153473	-4.38674	1.15e-05	0.000478878
ENSMUSG00000030513	Pcsk6	-0.684215	0.212459	-3.22046	0.00127986	0.0210076
ENSMUSG00000082431	Prdx2-ps1	-0.685499	0.224562	-3.05261	0.00226861	0.031834
ENSMUSG00000022206	Npr3	-0.686282	0.0931022	-7.37128	1.69e-13	4.65e-11
ENSMUSG00000040562	Gstm2	-0.687992	0.122841	-5.60067	2.14e-08	2.01e-06
ENSMUSG00000110669	Gm10060	-0.6934	0.243432	-2.84844	0.00439344	0.0497321
ENSMUSG00000027555	Car13	-0.693602	0.13963	-4.96743	6.78e-07	4.47e-05
ENSMUSG00000039007	Cpq	-0.694235	0.134445	-5.16371	2.42e-07	1.82e-05
ENSMUSG00000051439	Cd14	-0.696071	0.212627	-3.27367	0.0010616	0.0182547
ENSMUSG00000045658	Pid1	-0.696631	0.14191	-4.90897	9.16e-07	5.66e-05
ENSMUSG00000044043	Pcdhb14	-0.699624	0.192493	-3.63454	0.000278474	0.00662502
ENSMUSG00000027977	Ndst3	-0.702649	0.186888	-3.75974	0.000170089	0.00448113
ENSMUSG00000070576	Mn1	-0.702863	0.233792	-3.00636	0.00264397	0.0354365
ENSMUSG00000051022	Hs3st1	-0.705318	0.130006	-5.42528	5.79e-08	4.95e-06
ENSMUSG00000074604	Mgst2	-0.706499	0.247857	-2.85043	0.00436597	0.0494871
ENSMUSG00000052957	Gas1	-0.706722	0.118597	-5.95903	2.54e-09	3.05e-07
ENSMUSG00000084762	Platr3	-0.708573	0.178171	-3.97692	6.98e-05	0.00218762
ENSMUSG00000026365	Cfh	-0.708651	0.147289	-4.81129	1.5e-06	8.73e-05
ENSMUSG00000049093	Il23r	-0.709553	0.224266	-3.16389	0.00155677	0.024278
ENSMUSG00000026380	Tfcp2l1	-0.710679	0.202131	-3.51594	0.000438203	0.00967284
ENSMUSG00000059325	Hopx	-0.710762	0.146101	-4.86486	1.15e-06	6.94e-05
ENSMUSG00000017697	Ada	-0.715462	0.204997	-3.4901	0.000482837	0.0104186
ENSMUSG00000028780	Sema3c	-0.717909	0.123252	-5.82473	5.72e-09	6.15e-07
ENSMUSG00000050201	Otop2	-0.71795	0.224775	-3.19409	0.00140273	0.0224755
ENSMUSG00000019102	Aldh3a1	-0.722515	0.223547	-3.23206	0.00122902	0.0203469
ENSMUSG00000031963	Bmper	-0.729752	0.105222	-6.93534	4.05e-12	8.65e-10
ENSMUSG00000030747	Dgat2	-0.731839	0.156969	-4.66231	3.13e-06	0.000164195
ENSMUSG00000056481	Cd248	-0.736602	0.158478	-4.64798	3.35e-06	0.000173309
ENSMUSG00000040181	Fmo1	-0.737426	0.150237	-4.90841	9.18e-07	5.66e-05
ENSMUSG00000060807	Serpina6	-0.737644	0.163023	-4.5248	6.05e-06	0.000282177
ENSMUSG00000020251	Glt8d2	-0.740448	0.13914	-5.32162	1.03e-07	8.34e-06
ENSMUSG00000032332	Col12a1	-0.756304	0.0951013	-7.95261	1.83e-15	8.18e-13
ENSMUSG00000045545	Krt14	-0.758594	0.177751	-4.26774	1.97e-05	0.000754118
ENSMUSG00000048732	Klhl11	-0.758618	0.191655	-3.95824	7.55e-05	0.00234414
ENSMUSG00000041577	Prelp	-0.761084	0.105103	-7.24134	4.44e-13	1.17e-10
ENSMUSG00000030220	Arhgdib	-0.771179	0.197159	-3.91147	9.17e-05	0.00274047
ENSMUSG00000027068	Dhrs9	-0.776159	0.112762	-6.88319	5.85e-12	1.17e-09
ENSMUSG00000015568	Lpl	-0.785751	0.186308	-4.21749	2.47e-05	0.000912325
ENSMUSG00000029304	Spp1	-0.786986	0.127927	-6.15186	7.66e-10	1.01e-07
ENSMUSG00000029648	Flt1	-0.787713	0.233906	-3.36764	0.000758136	0.0143746
ENSMUSG00000029371	Cxcl5	-0.787871	0.132871	-5.92958	3.04e-09	3.52e-07
ENSMUSG00000024065	Ehd3	-0.799585	0.1046	-7.64419	2.1e-14	7.64e-12
ENSMUSG00000015766	Eps8	-0.809064	0.115094	-7.0296	2.07e-12	5.06e-10
ENSMUSG00000027996	Sfrp2	-0.810719	0.0966822	-8.3854	5.06e-17	2.72e-14
ENSMUSG00000033207	Mamdc2	-0.813282	0.221402	-3.67332	0.000239416	0.00588387
ENSMUSG00000029380	Cxcl1	-0.815668	0.163959	-4.97482	6.53e-07	4.39e-05
ENSMUSG00000029838	Ptn	-0.821182	0.118603	-6.92376	4.4e-12	9.24e-10
ENSMUSG00000037206	Islr	-0.821771	0.125691	-6.53803	6.23e-11	1.01e-08
ENSMUSG00000046561	Arsj	-0.824517	0.158568	-5.19977	2e-07	1.53e-05
ENSMUSG00000070348	Ccnd1	-0.831229	0.120617	-6.89148	5.52e-12	1.12e-09
ENSMUSG00000028036	Ptgfr	-0.835908	0.207427	-4.02989	5.58e-05	0.00182076
ENSMUSG00000028864	Hgf	-0.839327	0.221836	-3.78354	0.000154612	0.00419646
ENSMUSG00000028369	Svep1	-0.84079	0.187211	-4.49113	7.08e-06	0.000322839
ENSMUSG00000039323	Igfbp2	-0.841305	0.123011	-6.83928	7.96e-12	1.53e-09
ENSMUSG00000016024	Lbp	-0.846638	0.264616	-3.19949	0.00137671	0.0221642
ENSMUSG00000037138	Aff3	-0.850391	0.212189	-4.0077	6.13e-05	0.00195313
ENSMUSG00000023913	Pla2g7	-0.858786	0.174224	-4.92921	8.26e-07	5.31e-05
ENSMUSG00000053675	Tgm5	-0.859233	0.204675	-4.19803	2.69e-05	0.000983555
ENSMUSG00000035948	Acss3	-0.864259	0.195356	-4.42403	9.69e-06	0.000417409
ENSMUSG00000024011	Pi16	-0.865458	0.195764	-4.42092	9.83e-06	0.000422113
ENSMUSG00000035692	Isg15	-0.867628	0.188184	-4.61052	4.02e-06	0.000201473
ENSMUSG00000030087	Klf15	-0.867683	0.177564	-4.8866	1.03e-06	6.3e-05
ENSMUSG00000027339	Rassf2	-0.876291	0.174843	-5.01187	5.39e-07	3.72e-05
ENSMUSG00000056174	Col8a2	-0.881029	0.128814	-6.83956	7.94e-12	1.53e-09
ENSMUSG00000041828	Abca8a	-0.88295	0.29129	-3.03117	0.00243607	0.0332923
ENSMUSG00000021803	Cdhr1	-0.88613	0.12724	-6.96424	3.3e-12	7.4e-10
ENSMUSG00000036298	Slc2a13	-0.887587	0.202737	-4.37803	1.2e-05	0.000487874
ENSMUSG00000030218	Mgp	-0.89643	0.15031	-5.96386	2.46e-09	2.98e-07
ENSMUSG00000033715	Akr1c14	-0.897983	0.273879	-3.27875	0.00104266	0.0180626
ENSMUSG00000046623	Gjb4	-0.898725	0.143861	-6.24716	4.18e-10	5.73e-08
ENSMUSG00000065037	Rn7sk	-0.900692	0.256604	-3.51005	0.000448021	0.00984109
ENSMUSG00000035385	Ccl2	-0.902274	0.221533	-4.07286	4.64e-05	0.00157251
ENSMUSG00000103032	Gm37121	-0.920372	0.315522	-2.91699	0.00353431	0.042842
ENSMUSG00000004035	Gstm7	-0.927798	0.275465	-3.36811	0.000756843	0.0143746
ENSMUSG00000051920	Rspo2	-0.930805	0.170129	-5.47118	4.47e-08	3.93e-06
ENSMUSG00000027200	Sema6d	-0.937248	0.166742	-5.62094	1.9e-08	1.82e-06
ENSMUSG00000103509	Gm38372	-0.937428	0.277086	-3.38316	0.000716556	0.0138599
ENSMUSG00000027848	Olfml3	-0.94593	0.130257	-7.26205	3.81e-13	1.03e-10
ENSMUSG00000018341	Il12rb2	-0.947579	0.216156	-4.38378	1.17e-05	0.000481189
ENSMUSG00000020140	Lgr5	-0.948094	0.288061	-3.29129	0.000997294	0.0174793
ENSMUSG00000017493	Igfbp4	-0.950863	0.135619	-7.01129	2.36e-12	5.57e-10
ENSMUSG00000020044	Timp3	-0.954772	0.114778	-8.31842	8.91e-17	4.44e-14
ENSMUSG00000030222	Rerg	-0.957768	0.221339	-4.32714	1.51e-05	0.000595493
ENSMUSG00000102692	Dchs2	-0.963947	0.152638	-6.31524	2.7e-10	3.86e-08
ENSMUSG00000063142	Kcnma1	-0.970723	0.283225	-3.42739	0.000609414	0.0122824
ENSMUSG00000028972	Car6	-0.973967	0.155655	-6.25722	3.92e-10	5.49e-08
ENSMUSG00000020866	Cacna1g	-0.988315	0.163607	-6.04078	1.53e-09	1.95e-07
ENSMUSG00000031698	Mylk3	-0.992318	0.210464	-4.7149	2.42e-06	0.000133235
ENSMUSG00000056498	Tmem154	-0.996585	0.31848	-3.12919	0.00175287	0.0264168
ENSMUSG00000106106	CT010467.1	-1.01791	0.309446	-3.28946	0.0010038	0.0175704
ENSMUSG00000052133	Sema5b	-1.02112	0.335882	-3.0401	0.00236496	0.0327134
ENSMUSG00000000435	Myf5	-1.02492	0.313657	-3.26765	0.00108445	0.0184881
ENSMUSG00000022037	Clu	-1.02661	0.11956	-8.58657	8.96e-18	5.24e-15
ENSMUSG00000027832	Ptx3	-1.02731	0.115321	-8.90821	5.19e-19	3.94e-16
ENSMUSG00000032271	Nnmt	-1.03939	0.254099	-4.09048	4.3e-05	0.00147624
ENSMUSG00000047793	Sned1	-1.06532	0.140117	-7.60306	2.89e-14	1.02e-11
ENSMUSG00000069972	Rps13-ps2	-1.08167	0.334813	-3.23067	0.00123502	0.0204211
ENSMUSG00000025163	Cd7	-1.09815	0.270397	-4.06126	4.88e-05	0.0016281
ENSMUSG00000074207	Adh1	-1.10175	0.195295	-5.64147	1.69e-08	1.64e-06
ENSMUSG00000027386	Fbln7	-1.11163	0.108196	-10.2742	9.21e-25	1.55e-21
ENSMUSG00000105199	Gm43581	-1.13906	0.364684	-3.12342	0.00178762	0.0267605
ENSMUSG00000026271	Gpr35	-1.14393	0.145014	-7.88842	3.06e-15	1.25e-12
ENSMUSG00000028989	Angptl7	-1.14902	0.217551	-5.28161	1.28e-07	1.02e-05
ENSMUSG00000050395	Tnfsf15	-1.17517	0.19521	-6.02005	1.74e-09	2.17e-07
ENSMUSG00000020427	Igfbp3	-1.20182	0.12099	-9.93321	2.98e-23	4.46e-20
ENSMUSG00000050541	Adra1b	-1.20977	0.224497	-5.38879	7.09e-08	5.92e-06
ENSMUSG00000069516	Lyz2	-1.21965	0.37195	-3.27906	0.00104152	0.0180626
ENSMUSG00000037379	Spon2	-1.22099	0.114202	-10.6915	1.12e-26	2.5e-23
ENSMUSG00000031250	Tnmd	-1.2432	0.266831	-4.65912	3.18e-06	0.000166111
ENSMUSG00000063564	Col23a1	-1.25079	0.296377	-4.22027	2.44e-05	0.000903655
ENSMUSG00000005360	Slc1a3	-1.25313	0.100669	-12.4481	1.43e-35	1.93e-31
ENSMUSG00000007872	Id3	-1.27233	0.158757	-8.01428	1.11e-15	5.14e-13
ENSMUSG00000035373	Ccl7	-1.31489	0.197811	-6.64722	2.99e-11	5.14e-09
ENSMUSG00000024924	Vldlr	-1.33171	0.426071	-3.12556	0.00177467	0.0266558
ENSMUSG00000086181	C230034O21Rik	-1.35042	0.361	-3.74077	0.000183455	0.0047887
ENSMUSG00000022371	Col14a1	-1.37651	0.154552	-8.90642	5.27e-19	3.94e-16
ENSMUSG00000041112	Elmo1	-1.3814	0.150402	-9.18476	4.12e-20	3.47e-17
ENSMUSG00000025165	Sectm1a	-1.3816	0.351645	-3.92895	8.53e-05	0.00258895
ENSMUSG00000048368	Omd	-1.38881	0.24351	-5.70331	1.18e-08	1.18e-06
ENSMUSG00000103793	Pcdhga6	-1.40433	0.364469	-3.85307	0.000116646	0.00332218
ENSMUSG00000049123	Catsperg2	-1.40494	0.201323	-6.97856	2.98e-12	6.91e-10
ENSMUSG00000103047	Gm37310	-1.41308	0.216052	-6.54047	6.13e-11	1.01e-08
ENSMUSG00000001493	Meox1	-1.47627	0.261517	-5.64502	1.65e-08	1.63e-06
ENSMUSG00000026360	Rgs2	-1.48073	0.295457	-5.01167	5.4e-07	3.72e-05
ENSMUSG00000026668	Ucma	-1.48631	0.299157	-4.96832	6.75e-07	4.47e-05
ENSMUSG00000056973	Ces1d	-1.5077	0.516667	-2.91812	0.00352147	0.0428033
ENSMUSG00000022340	Sybu	-1.51386	0.34534	-4.38368	1.17e-05	0.000481189
ENSMUSG00000005089	Slc1a2	-1.56232	0.266551	-5.86126	4.59e-09	5.02e-07
ENSMUSG00000057880	Abat	-1.61298	0.242769	-6.64409	3.05e-11	5.14e-09
ENSMUSG00000048424	Ranbp3l	-1.67409	0.146685	-11.4129	3.61e-30	1.21e-26
ENSMUSG00000029361	Nos1	-1.84583	0.2094	-8.81489	1.2e-18	8.48e-16
